# Supplementary material for: Copper-catalyzed 5-endo-trig cyclization of ketoxime carboxylates: a facile synthesis of 2-arylpyrroles
Source: Royal Society of Chemistry journal article supplement (doi:10.1039/c4cc03129f), 2014-01-01

*Supporting Information For:*

**Copper-Catalyzed 5-Endo-trig Cyclization of Ketoxime Carboxylates: A Facile  
Synthesis of 2-Arylpyrroles**

Wei Du, Mi-Na Zhao, Zhi-Hui Ren, Yao-Yu Wang and Zheng-Hui Guan\*

*Key Laboratory of Synthetic and Natural Functional Molecule Chemistry of Ministry of Education,  
Department of Chemistry & Materials Science, Northwest University, Xi'an 710069, P. R. China*

*E-mail: [guanzzhh@nwu.edu.cn](mailto:guanzzhh@nwu.edu.cn)*

**CONTENTS**

|                                                                  |                |
|------------------------------------------------------------------|----------------|
| <b>1. General Information</b>                                    | <b>S2</b>      |
| <b>2. General Procedure for Preparation of Ketoxime Acetates</b> | <b>S2–S5</b>   |
| <b>3. General Procedure for Synthesis of 2-Arylpyrroles</b>      | <b>S5</b>      |
| <b>4. Spectroscopic Data for Products</b>                        | <b>S5–S9</b>   |
| <b>5. Copies of <sup>1</sup>H and <sup>13</sup>C NMR Spectra</b> | <b>S10–S39</b> |

## 1. General Information

$^1\text{H}$  and  $^{13}\text{C}$  NMR spectra were recorded on Varian instrument (400 MHz) and (100 MHz). The following abbreviations (or combinations thereof) were used to explain multiplicities: s = singlet, d = doublet, t = triplet, q = quartet, m = multiplet. Coupling constants, J were reported in Hertz unit (Hz). Preparative TLC was performed on TLC plate, Analytical thin layer chromatography was performed on 10-25um silica gel GF254, visualization was carried out with UV light. Flash column chromatography was performed with  $\text{SiO}_2$  (Silicycle Silica Gel (200-300 mesh)). Unless otherwise stated, all reagents and solvents were purchased from commercial suppliers and used without further purification.

## 2. General Procedure for Preparation of Ketoxime Acetates

### Procedure for Preparation of Ketoxime Acetates 1a-1m:

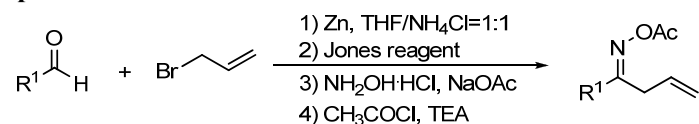

1) To a solution of the aldehyde (1.0 equiv) in anhydrous THF was added the allylbromide (2.0 equiv) and saturated aqueous  $\text{NH}_4\text{Cl}$ . Then, the zinc dust (2.0 equiv) was slowly added to the solution at  $0^\circ\text{C}$  and the resulting suspension was stirred overnight at this temperature. After completion of the reaction, filtered and extracted with ethyl acetate for 3 times. The combined organic layers were washed with brine, dried over  $\text{Na}_2\text{SO}_4$ , filtered and concentrated in vacuo. The crude allylic alcohol product was directly used in the next step without further purification.<sup>[1]</sup>

2) Allylic alcohol (1.0 equiv) was dissolved in diethyl ether and the solution was kept at  $0^\circ\text{C}$  with stirring. The Jones reagent (2.0-4.0 equiv) was added dropwise at this temperature. Then, the resulting mixture was allowed to warm to room temperature and stirred for 1 h. After completion of the reaction, the diethyl ether layer was separated from the aqueous layer, which was extracted with diethyl ether for 3 times. The combined diethyl ether layers were washed with brine, dried over  $\text{Na}_2\text{SO}_4$ , filtered and concentrated in vacuo. The crude ketone product was directly used in the next step without further purification.<sup>[2]</sup>

3) To a solution of hydroxylamine hydrochloride (5.0 equiv) in water was stirred at room temperature. Sodium acetate (7.0 equiv) was dissolved in ethanol and added to the solution. The mixture was stirred at this temperature while the ketone (dissolved in ethanol) was added. The resulting suspension was stirred overnight and concentrated in vacuo. Then, the mixture was extracted with ethyl acetate 3 times and the combined extracts were washed with water and brine, dried over Na<sub>2</sub>SO<sub>4</sub>, filtered and concentrated in vacuo. The crude material was purified by flash chromatography on silica gel to afford the corresponding ketoxime.<sup>[3]</sup>

4) To a solution of the ketoxime (1 equiv) and TEA (Et<sub>3</sub>N) (2 equiv) in anhydrous CH<sub>2</sub>Cl<sub>2</sub> (20 mL) was stirred at 0°C while CH<sub>3</sub>COCl (1.1 equiv) in CH<sub>2</sub>Cl<sub>2</sub> (5 ml) was added dropwise. Then, the resulting mixture was stirred for 2h at the same temperature. After completion of the reaction, water was added and the mixture extracted with CH<sub>2</sub>Cl<sub>2</sub> for 3 times. The combined organic extracts were washed with water, brine, dried over Na<sub>2</sub>SO<sub>4</sub>, filtered and concentrated in vacuo. The crude material was purified by flash chromatography on silica gel to afford the corresponding ketoxime acetate with hexanes/ethyl acetate as the eluent.<sup>[4]</sup>

**Procedure for Preparation of Ketoxime Acetates 1n and 1p:**

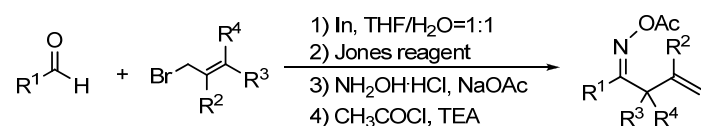

1) To a solution of the 3-bromo-2-methylprop-1-ene (1.1 equiv) or its analogue and indium (1.1 equiv) in THF/H<sub>2</sub>O (1:1) was stirred at room temperature while the aldehyde (1.0 equiv) was added to the solution. Then, the resulting mixture was stirred for 10-24 h at the same temperature. After completion of the reaction, saturated ammonium chloride was added at 0°C. The THF layer was separated from the aqueous layer, which was extracted with diethyl ether for 3 times. The combined organic layers were washed with brine, dried over Na<sub>2</sub>SO<sub>4</sub>, filtered and concentrated in vacuo. The crude allylic alcohol product was directly used in the next step without further purification.<sup>[5]</sup>

Steps 2), 3), and 4) are same as above-mentioned.

#### Procedure for Preparation of Ketoxime Acetate 1o:

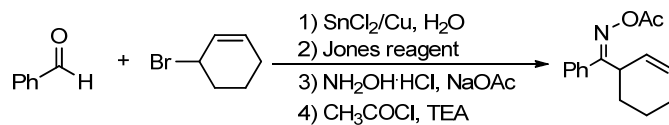

1) Benzaldehyde (1.0 equiv) and 3-bromo-1-cyclohexene (1.8 equiv) were added in water and the solution was kept at room temperature with stirring while the  $\text{SnCl}_2\cdot\text{H}_2\text{O}$  (2.0 equiv) and copper powder (1.0 equiv) were added. Then, the resulting mixture was vigorously stirred at this temperature for 24 h. After completion of the reaction, the mixture was extracted with ethyl acetate (3×30 mL). The combined organic layers were dried over anhydrous  $\text{Na}_2\text{SO}_4$ , filtered and evaporated. The crude material was purified by flash chromatography on silica gel to afford the cyclohex-2-en-1-yl(phenyl)methanol.<sup>[6]</sup>

Steps 2), 3), and 4) are same as above-mentioned.

#### Procedure for Preparation of Ketoxime Acetate 1q:

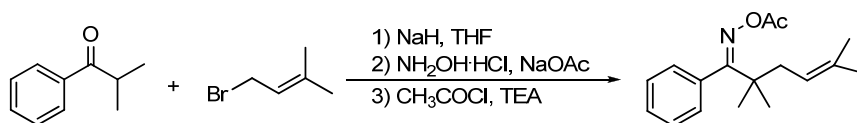

1) To a solution of the isobutyrophenone (0.60 mL, 3.88 mmol) in anhydrous THF (15 mL) was added the NaH (186 mg, 4.65 mmol). The solution was stirred at room temperature for 0.5h. Then, the solution of 1-bromo-3-methylbut-2-ene (0.69 g, 4.66 mmol) in THF (5.0 mL) was slowly added to the solution at this temperature and the resulting suspension was stirred at reflux for 8 h. After completion of the reaction, the reaction mixture was cooled to room temperature. The reaction was quenched by adding saturated aqueous  $\text{NH}_4\text{Cl}$ , and the mixture was extracted with ethyl acetate for 3 times. The combined organic extracts were washed with water, brine, dried over  $\text{Na}_2\text{SO}_4$ , filtered and concentrated in vacuo. The crude material was purified by flash chromatography on silica gel.<sup>[7]</sup>

Steps 2), and 3) are same as above-mentioned.

#### Reference:

[1] Dam, J. H.; Fristrup, P.; Madsen, R. *J. Org. Chem.* 2008, **73**, 3228.

- [2] Jiang, D.; Peng, J.; Chen, Y. *Org. Lett.* 2008, **10**, 1695.
- [3] Garzan, A.; Jaganathan, A.; Marzijarani, N. S.; Yousefi, R.; Whitehead, D. C.; Jackson, J. E.; Borhan, B. *Chem. Eur. J.* 2013, **19**, 9015.
- [4] Zaman, S.; Mitsuru, K.; Abell, A. D. *Org. Lett.* 2005, **7**, 609.
- [5] Zhu, M.-K.; Zhao, J.-F.; Loh, T.-P. *J. Am. Chem. Soc.* 2010, **132**, 6284.
- [6] Tan, X.-H.; Tao, C.-Z.; Hou, Y.-Q.; Luo, L.; Liu, L.; Guo, Q.-X. *Chin. J. Chem.* 2005, **23**, 237.
- [7] Han, B.; Yang, X.-L.; Fang, R.; Yu, W.; Wang, C.; Duan, X.-Y.; Liu, S. *Angew. Chem., Int. Ed.* 2012, **51**, 8816.

### 3. General Procedure for Synthesis of 2-Arylpyrroles

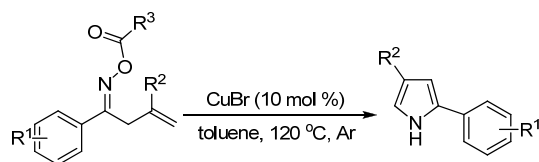

Ketoxime carboxylate (0.3 mmol), CuBr (10 mol%, 4.3 mg), and toluene (3 mL) was charged in a 25 mL round bottom flask. Then, the flask was evacuated and back-filled with Ar (3-times, balloon) and stirred at 120 °C. When the reaction was completed (detected by TLC), the mixture was cooled to room temperature. The reaction was quenched with H<sub>2</sub>O (10 mL) and extracted with ethyl acetate (3 × 10 mL). The combined organic layers were dried over anhydrous Na<sub>2</sub>SO<sub>4</sub> and then evaporated in vacuo. The residue was purified by column chromatography on silica gel to afford the corresponding pyrroles with hexanes/ethyl acetate as the eluent.

### 4. Spectroscopic Data for Products

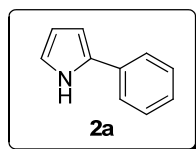

**2a:** <sup>1</sup>H NMR (DMSO-*d*<sup>6</sup>, 400 MHz): δ = 11.28 (s, 1 H), 7.62 (d, *J* = 7.6 Hz, 2 H), 7.34 (t, *J* = 7.6 Hz, 2 H), 7.14 (t, *J* = 7.2 Hz, 1 H), 6.84 (s, 1 H), 6.51 (s, 1 H), 6.11 (s, 1 H); <sup>13</sup>C NMR (DMSO-*d*<sup>6</sup>, 100 MHz): δ = 133.0, 131.1, 128.7, 125.4, 123.3, 119.3, 109.1, 105.6. HRMS Calcd (ESI) *m/z* for C<sub>10</sub>H<sub>10</sub>N: [M+H]<sup>+</sup> 144.0808, found: 144.0814.

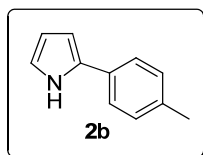

**2b:**  $^1\text{H}$  NMR ( $\text{CDCl}_3$ , 400 MHz):  $\delta$  = 8.38 (s, 1 H), 7.36 (d,  $J$  = 7.6 Hz, 2 H), 7.17 (d,  $J$  = 7.2 Hz, 2 H), 6.83 (s, 1 H), 6.48 (s, 1 H), 6.29 (s, 1 H), 2.35 (s, 3 H);  $^{13}\text{C}$  NMR ( $\text{CDCl}_3$ , 100 MHz):  $\delta$  = 135.8, 132.1, 129.9, 129.5, 123.7, 118.4, 109.8, 105.3, 21.1. HRMS Calcd (ESI)  $m/z$  for  $\text{C}_{11}\text{H}_{12}\text{N}$ :  $[\text{M}+\text{H}]^+$  158.0964, found: 158.0967.

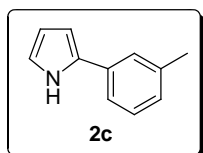

**2c:**  $^1\text{H}$  NMR ( $\text{DMSO}-d^6$ , 400 MHz):  $\delta$  = 11.25 (s, 1 H), 7.46-7.41 (m, 2 H), 7.22 (t,  $J$  = 7.2 Hz, 1 H), 6.96 (d,  $J$  = 6.8 Hz, 1 H), 6.83 (s, 1 H), 6.49 (s, 1 H), 6.11 (s, 1 H), 2.32 (s, 3 H);  $^{13}\text{C}$  NMR ( $\text{DMSO}-d^6$ , 100 MHz):  $\delta$  = 137.7, 133.0, 131.2, 128.6, 126.1, 124.0, 120.6, 119.2, 109.0, 105.5, 21.2. HRMS Calcd (ESI)  $m/z$  for  $\text{C}_{11}\text{H}_{10}\text{N}$ :  $[\text{M}-\text{H}]^+$  156.0819, found: 156.0823.

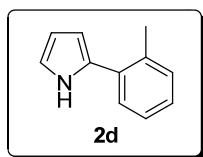

**2d:**  $^1\text{H}$  NMR ( $\text{DMSO}-d^6$ , 400 MHz):  $\delta$  = 10.98 (s, 1 H), 7.35 (d,  $J$  = 7.2 Hz, 1 H), 7.21-7.15 (m, 2 H), 7.11-7.08 (m, 1 H), 6.80 (s, 1 H), 6.19 (s, 1 H), 6.10 (s, 1 H), 2.36 (s, 3 H);  $^{13}\text{C}$  NMR ( $\text{DMSO}-d^6$ , 100 MHz):  $\delta$  = 134.1, 133.0, 130.8, 130.3, 127.7, 126.0, 125.8, 118.4, 108.5, 108.4, 21.3. HRMS Calcd (ESI)  $m/z$  for  $\text{C}_{11}\text{H}_{12}\text{N}$ :  $[\text{M}+\text{H}]^+$  158.0964, found: 158.0960.

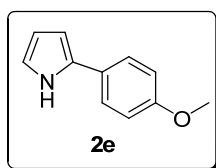

**2e:**  $^1\text{H}$  NMR ( $\text{CDCl}_3$ , 400 MHz):  $\delta$  = 8.33 (s, 1 H), 7.40 (d,  $J$  = 8.0 Hz, 2 H), 6.91 (d,  $J$  = 8.4 Hz, 2 H), 6.82 (s, 1 H), 6.41 (s, 1 H), 6.28 (s, 1 H), 3.82 (s, 3 H);  $^{13}\text{C}$  NMR ( $\text{CDCl}_3$ , 100 MHz):  $\delta$  = 158.1, 132.0, 125.8, 125.2, 118.2, 114.3, 109.8, 104.8, 55.2. HRMS Calcd (ESI)  $m/z$  for  $\text{C}_{11}\text{H}_{12}\text{NO}$ :  $[\text{M}+\text{H}]^+$  174.0913, found: 174.0920.

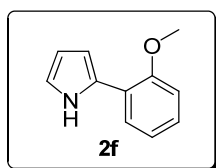

**2f:**  $^1\text{H}$  NMR (DMSO- $d^6$ , 400 MHz):  $\delta$  = 10.94 (s, 1 H), 7.62 (d,  $J$  = 7.2 Hz, 1 H), 7.15 (t,  $J$  = 7.6 Hz, 1 H), 7.04 (d,  $J$  = 8.0 Hz, 1 H), 6.96 (t,  $J$  = 7.6 Hz, 1 H), 6.83 (s, 1 H), 6.60 (s, 1 H), 6.12 (s, 1 H), 3.87 (s, 3 H);  $^{13}\text{C}$  NMR (DMSO- $d^6$ , 100 MHz):  $\delta$  = 154.7, 127.9, 126.5, 126.0, 121.4, 120.7, 118.6, 111.8, 108.2, 107.8, 55.3. HRMS Calcd (ESI)  $m/z$  for  $\text{C}_{11}\text{H}_{12}\text{NO}$ :  $[\text{M}+\text{H}]^+$  174.0913, found: 174.0920.

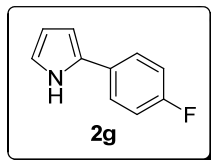

**2g:**  $^1\text{H}$  NMR (DMSO- $d^6$ , 400 MHz):  $\delta$  = 11.28 (s, 1 H), 7.63 (d,  $J$  = 5.2 Hz, 2 H), 7.18 (t,  $J$  = 7.2 Hz, 2 H), 6.84 (s, 1 H), 6.47 (s, 1 H), 6.11 (s, 1 H);  $^{13}\text{C}$  NMR (DMSO- $d^6$ , 100 MHz):  $\delta$  = 160.4 (d,  $J_{\text{CF}}$  = 240.6 Hz), 130.2, 129.7, 125.1 (d,  $J_{\text{CF}}$  = 7.8 Hz), 119.3, 115.5 (d,  $J_{\text{CF}}$  = 21.3 Hz), 109.1, 105.5. HRMS Calcd (ESI)  $m/z$  for  $\text{C}_{10}\text{H}_7\text{FN}$ :  $[\text{M}-\text{H}]^+$  160.0568, found: 160.0570.

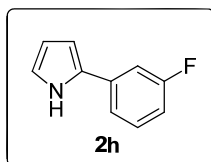

**2h:**  $^1\text{H}$  NMR (DMSO- $d^6$ , 400 MHz):  $\delta$  = 11.37 (s, 1 H), 7.46 (d,  $J$  = 8.0 Hz, 2 H), 7.38-7.33 (m, 1 H), 6.94 (t,  $J$  = 6.8 Hz, 1 H), 6.88 (s, 1 H), 6.60 (s, 1 H), 6.13 (s, 1 H);  $^{13}\text{C}$  NMR (DMSO- $d^6$ , 100 MHz):  $\delta$  = 162.8 (d,  $J_{\text{CF}}$  = 240.6 Hz), 135.4 (d,  $J_{\text{CF}}$  = 8.6 Hz), 130.6 (d,  $J_{\text{CF}}$  = 8.8 Hz), 129.9, 120.0, 119.3, 111.8 (d,  $J_{\text{CF}}$  = 21.1 Hz), 109.7 (d,  $J_{\text{CF}}$  = 22.7 Hz), 109.3, 106.8. HRMS Calcd (ESI)  $m/z$  for  $\text{C}_{20}\text{H}_{17}\text{F}_2\text{N}_2$ :  $[\text{2M}+\text{H}]^+$  323.1354, found: 323.1339.

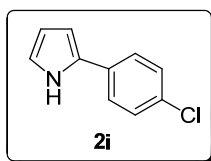

**2i:**  $^1\text{H}$  NMR ( $\text{CDCl}_3$ , 400 MHz):  $\delta$  = 8.41 (s, 1 H), 7.39 (d,  $J$  = 8.4 Hz, 2 H), 7.32 (d,  $J$  = 8.4 Hz, 2 H), 6.87 (s, 1 H), 6.51 (s, 1 H), 6.30 (s, 1 H);  $^{13}\text{C}$  NMR ( $\text{CDCl}_3$ , 100 MHz):  $\delta$  = 131.6, 131.1, 130.9, 128.9, 124.9, 119.2, 110.2, 106.3. HRMS Calcd (ESI)  $m/z$  for  $\text{C}_{10}\text{H}_7\text{ClN}$ :  $[\text{M}-\text{H}]^+$  176.0273, found: 176.0275.

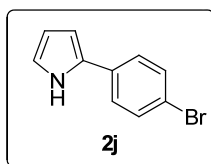

**2j:**  $^1\text{H}$  NMR (DMSO- $d^6$ , 400 MHz):  $\delta$  = 11.37 (s, 1 H), 7.58 (d,  $J$  = 8.4 Hz, 2 H), 7.51

(d,  $J = 8.0$  Hz, 2 H), 6.88 (s, 1 H), 6.55 (s, 1 H), 6.13 (s, 1 H);  $^{13}\text{C}$  NMR (DMSO- $d^6$ , 100 MHz):  $\delta = 132.2, 131.5, 129.9, 125.2, 119.9, 117.9, 109.3, 106.3$ . HRMS Calcd (ESI)  $m/z$  for  $\text{C}_{10}\text{H}_7\text{BrN}$ :  $[\text{M}-\text{H}]^+ 219.9767$ , found: 219.9778.

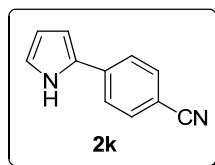

**2k**:  $^1\text{H}$  NMR (DMSO- $d^6$ , 400 MHz):  $\delta = 11.55$  (s, 1 H), 7.74 (s, 4 H), 6.95 (s, 1 H), 6.71 (s, 1 H), 6.15 (s, 1 H);  $^{13}\text{C}$  NMR (DMSO- $d^6$ , 100 MHz):  $\delta = 137.1, 132.7, 129.4, 123.5, 121.7, 119.4, 110.0, 108.7, 106.9$ . HRMS Calcd (ESI)  $m/z$  for  $\text{C}_{11}\text{H}_8\text{N}_2\text{Na}$ :  $[\text{M}+\text{Na}]^+ 191.0580$ , found: 191.0579.

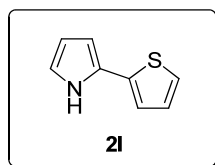

**2l**:  $^1\text{H}$  NMR ( $\text{CDCl}_3$ , 400 MHz):  $\delta = 8.29$  (s, 1 H), 7.14 (d,  $J = 4.0$  Hz, 1 H), 7.02 (s, 1 H), 7.01 (s, 1 H), 6.80 (s, 1 H), 6.41 (s, 1 H), 6.25 (s, 1 H);  $^{13}\text{C}$  NMR ( $\text{CDCl}_3$ , 100 MHz):  $\delta = 136.2, 127.6, 126.6, 122.6, 120.8, 118.5, 109.9, 106.6$ . HRMS Calcd (ESI)  $m/z$  for  $\text{C}_8\text{H}_8\text{NS}$ :  $[\text{M}+\text{H}]^+ 150.0372$ , found: 150.0374.

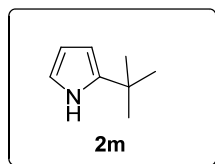

**2m**:  $^1\text{H}$  NMR ( $\text{CDCl}_3$ , 400 MHz):  $\delta = 7.92$  (s, 1 H), 6.59 (s, 1 H), 6.05 (s, 1 H), 5.87 (s, 1 H), 1.22 (s, 9 H);  $^{13}\text{C}$  NMR ( $\text{CDCl}_3$ , 100 MHz):  $\delta = 141.8, 115.9, 107.7, 102.3, 31.3, 30.6$ .

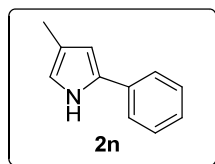

**2n**:  $^1\text{H}$  NMR ( $\text{CDCl}_3$ , 400 MHz):  $\delta = 8.08$  (s, 1 H), 7.39 (d,  $J = 7.2$  Hz, 2 H), 7.31 (t,  $J = 7.2$  Hz, 2 H), 7.16 (t,  $J = 7.2$  Hz, 1 H), 6.55 (s, 1 H), 6.36 (s, 1 H), 2.14 (s, 3 H);  $^{13}\text{C}$  NMR ( $\text{CDCl}_3$ , 100 MHz):  $\delta = 132.8, 131.9, 128.8, 125.9, 123.6, 120.5, 116.8, 107.4, 11.9$ . HRMS Calcd (ESI)  $m/z$  for  $\text{C}_{11}\text{H}_{12}\text{N}$ :  $[\text{M}+\text{H}]^+ 158.0964$ , found: 158.0970.



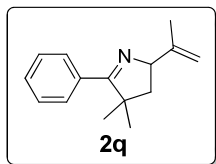

**2q:**  $^1\text{H}$  NMR ( $\text{CDCl}_3$ , 400 MHz):  $\delta$  = 7.75 (d,  $J$  = 3.6 Hz, 2 H), 7.38 (s, 3 H), 5.03 (s, 1 H), 4.86 (s, 1 H), 4.51 (t,  $J$  = 7.6 Hz, 1 H), 2.15-2.10 (m, 1 H), 1.81 (s, 3 H), 1.74 (t,  $J$  = 9.6 Hz, 1 H), 1.39 (s, 3 H), 1.34 (s, 3 H);  $^{13}\text{C}$  NMR ( $\text{CDCl}_3$ , 100 MHz):  $\delta$  = 179.6, 146.9, 134.6, 129.4, 128.0, 127.8, 110.0, 72.2, 50.3, 47.2, 27.0, 25.8, 19.8. HRMS Calcd (ESI)  $m/z$  for  $\text{C}_{15}\text{H}_{20}\text{N}$ :  $[\text{M}+\text{H}]^+$  214.1590, found: 214.1597.

## 5. Copies of $^1\text{H}$ and $^{13}\text{C}$ NMR Spectra

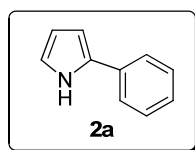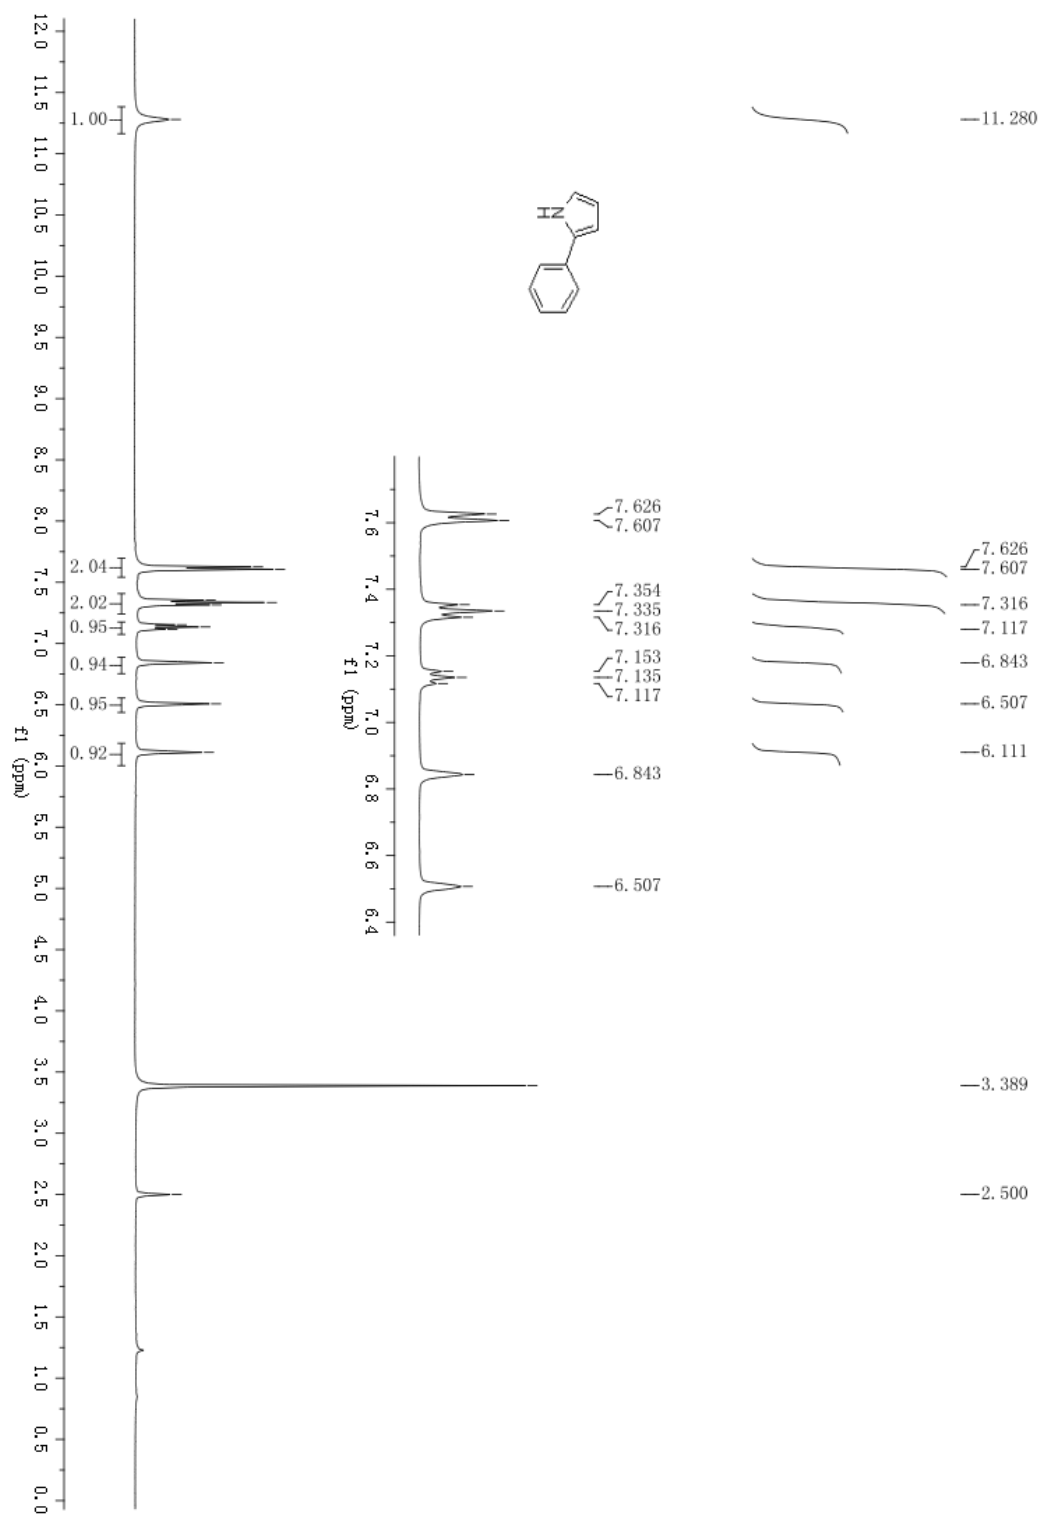

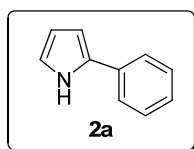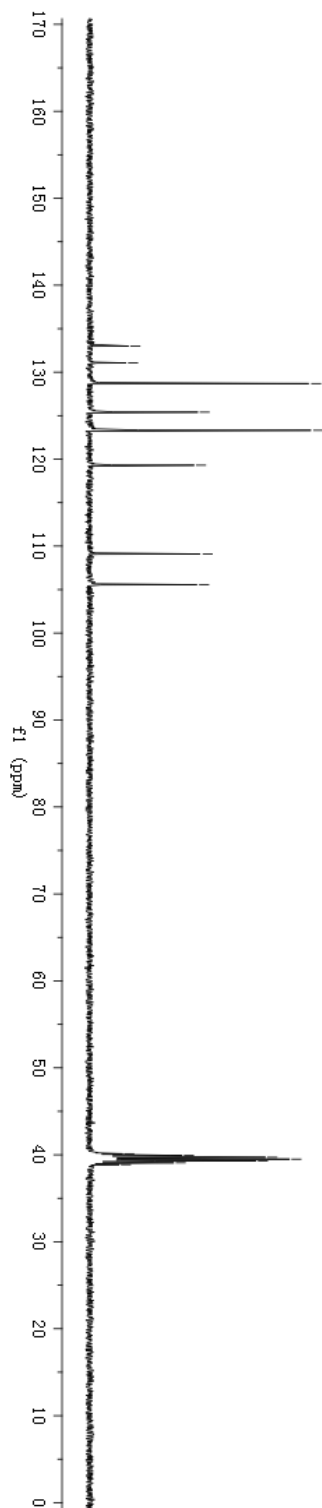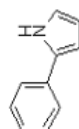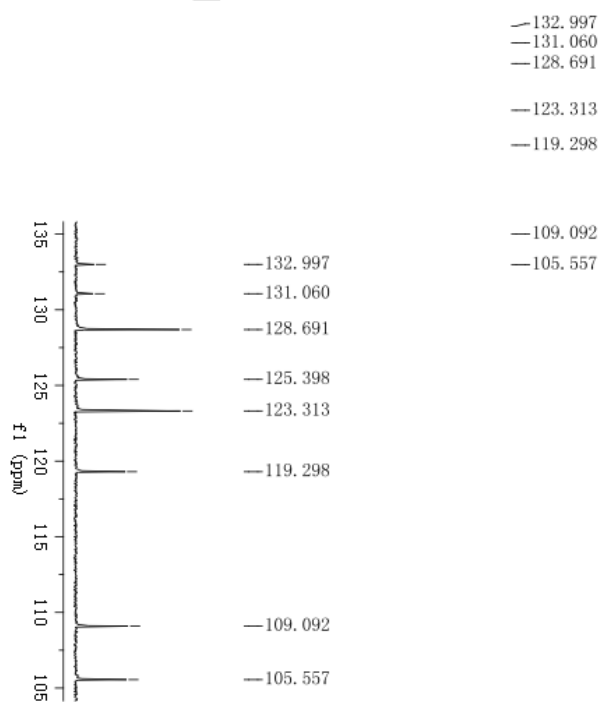

40.124  
39.917  
39.709  
39.500  
39.291  
39.082  
38.871

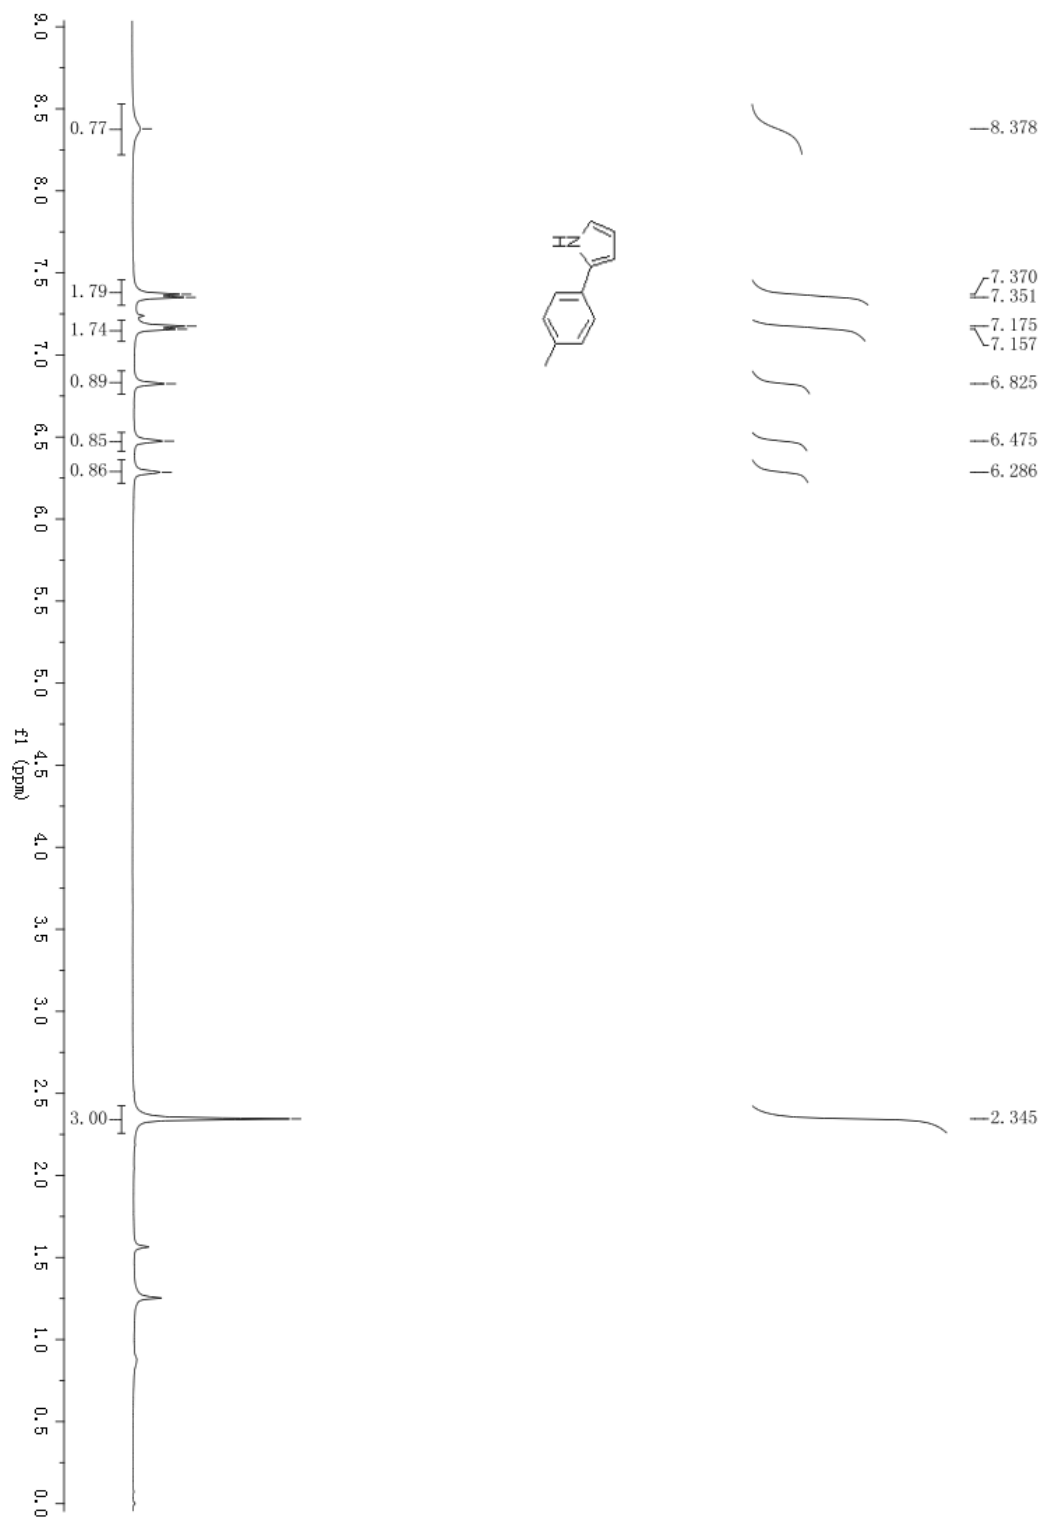

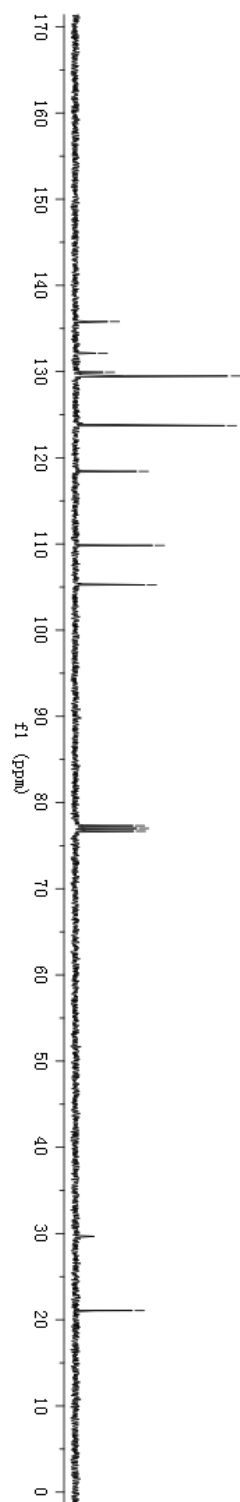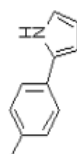

—135.795  
 —132.133  
 —129.923  
 —129.480  
 —123.731  
 —118.426  
 —109.840  
 —105.266

—77.317  
 —77.000  
 —76.681

—21.057

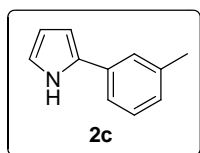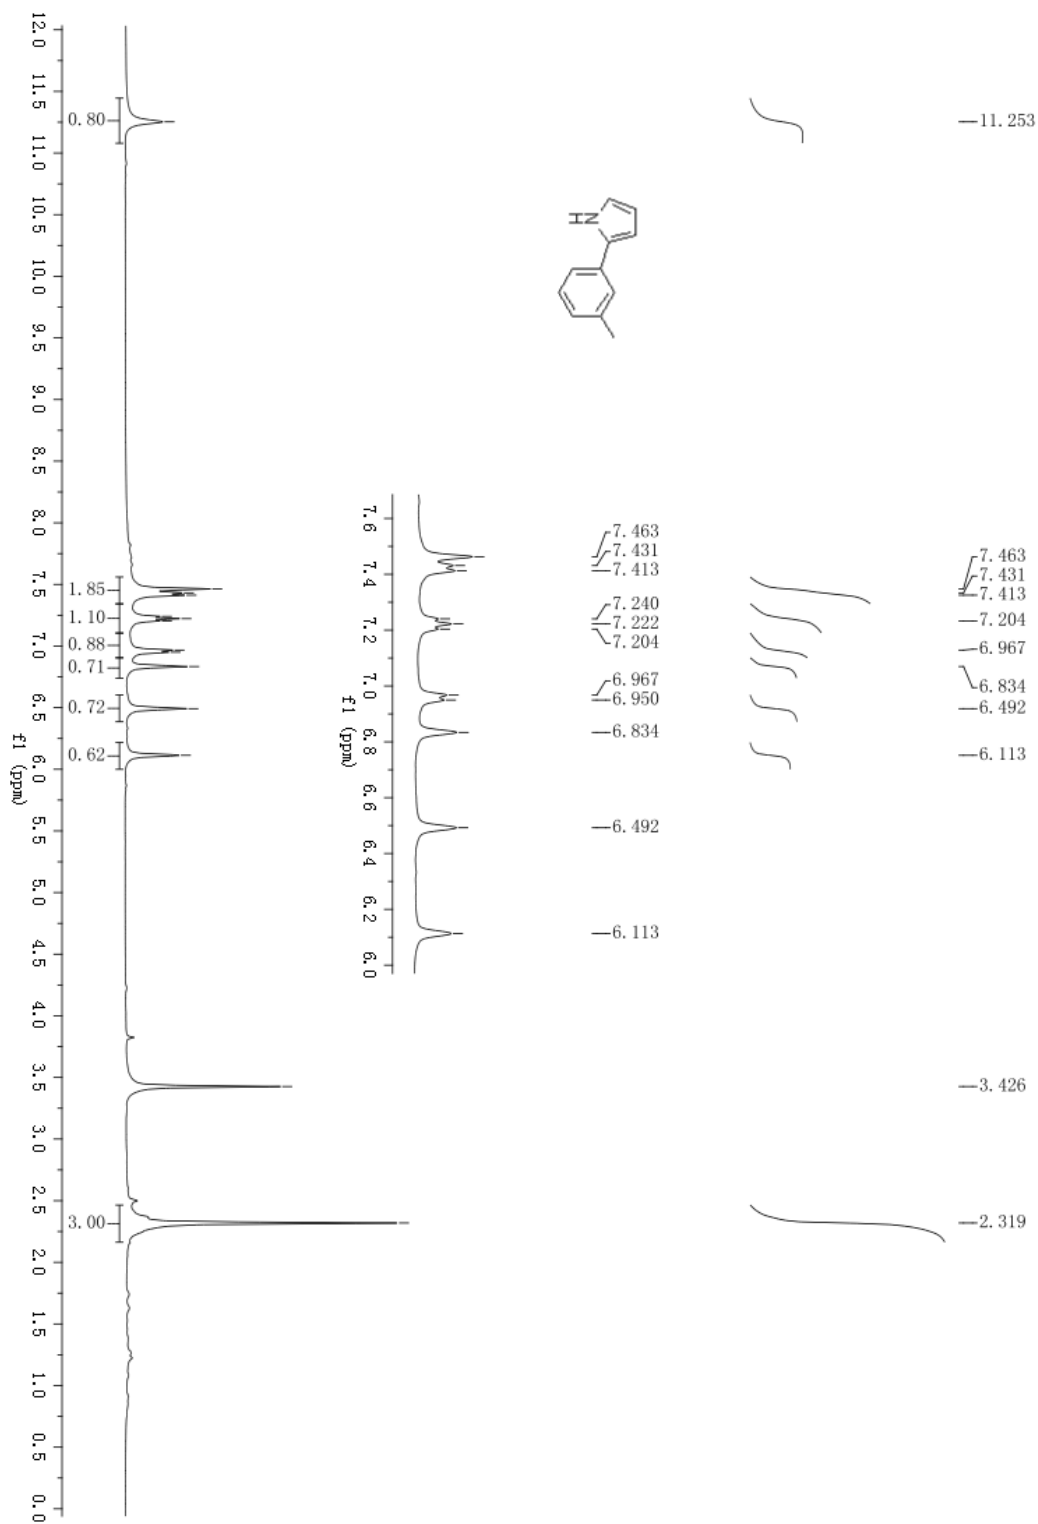

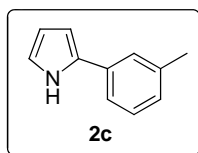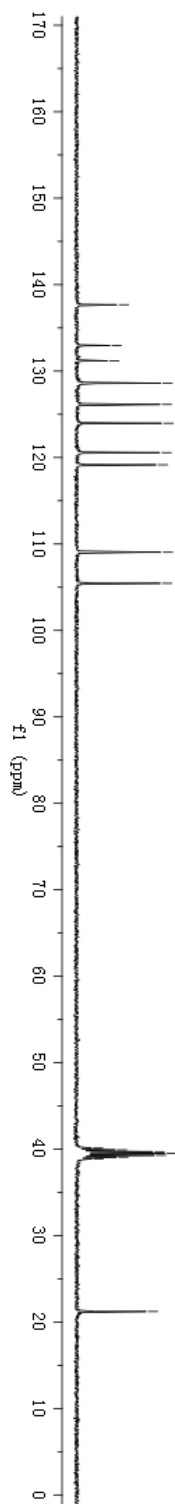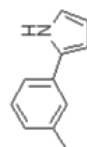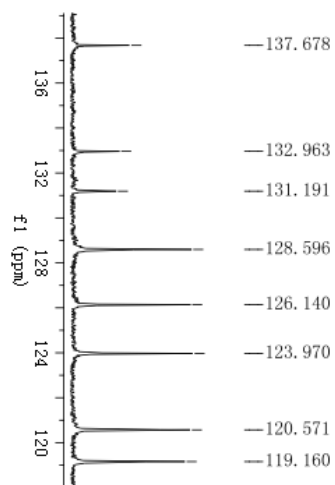

—137.678  
 —132.963  
 —131.191  
 —128.596  
 —123.970  
 —120.571  
 —119.160

—109.042  
 —105.453

40.128  
 39.916  
 39.707  
 39.500  
 39.290  
 39.080  
 38.871

—21.223

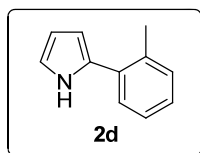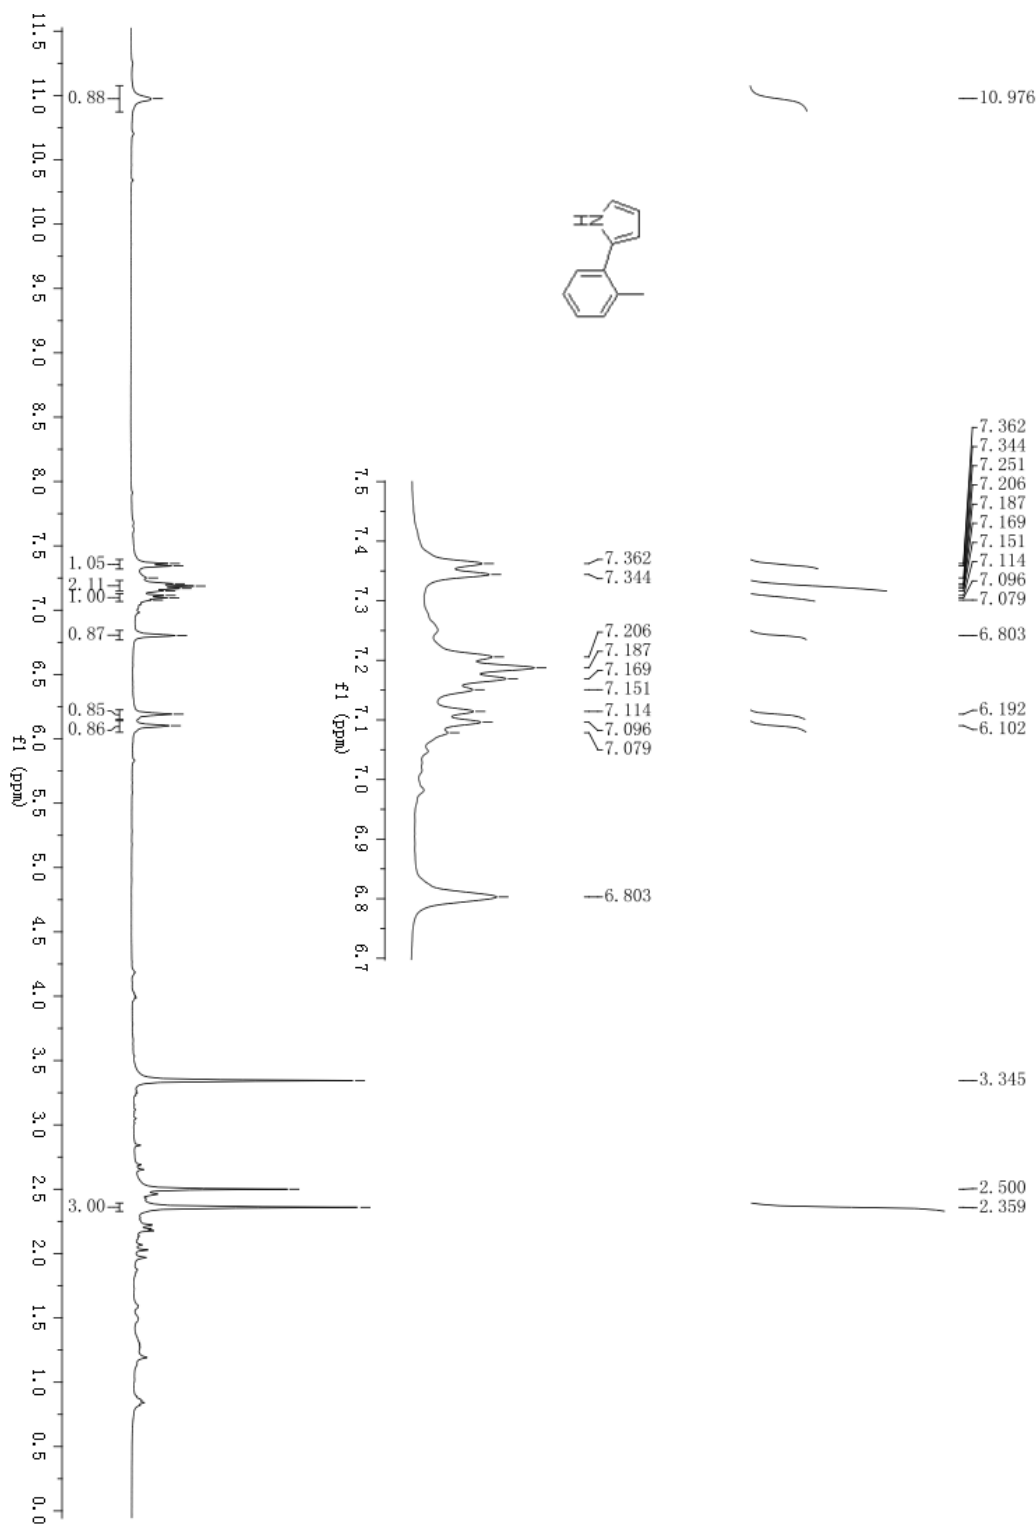



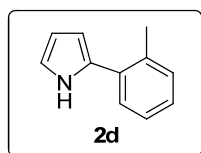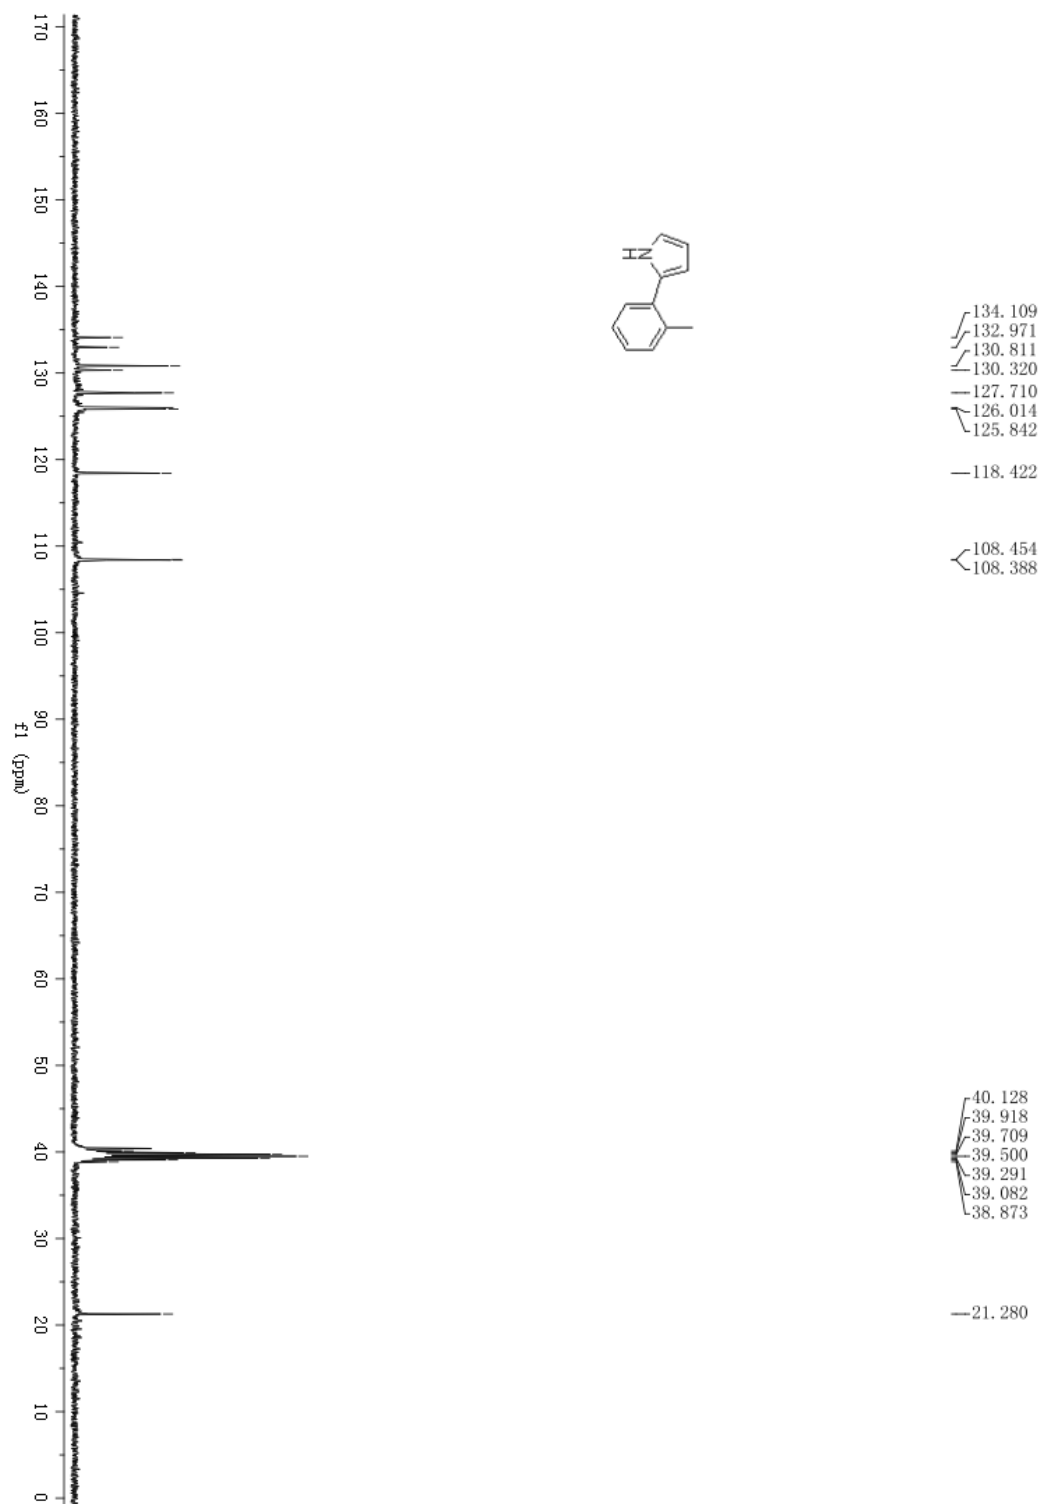

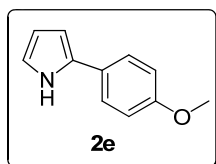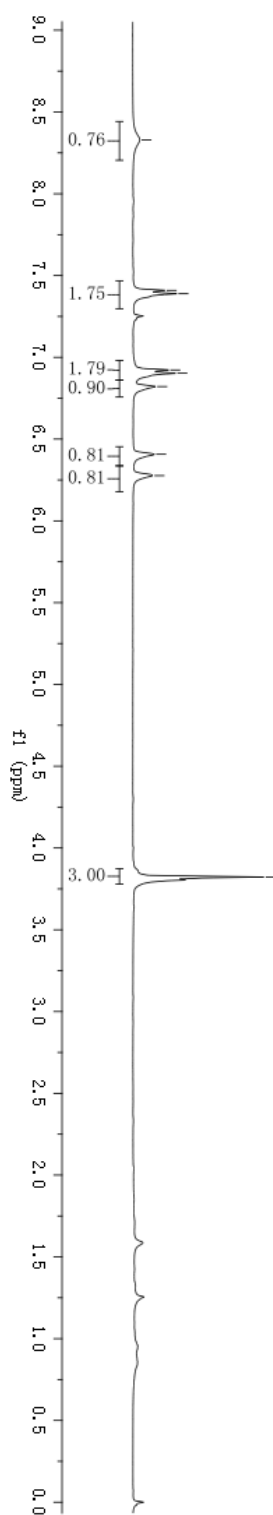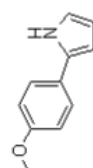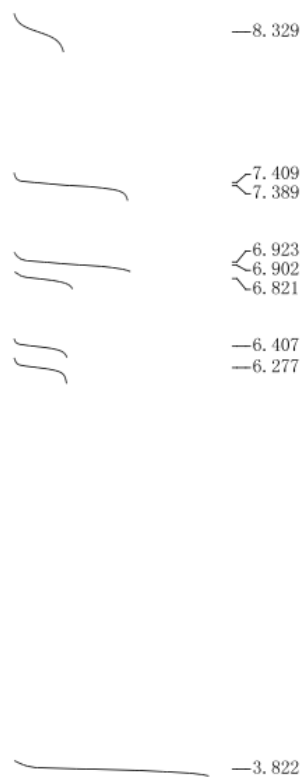

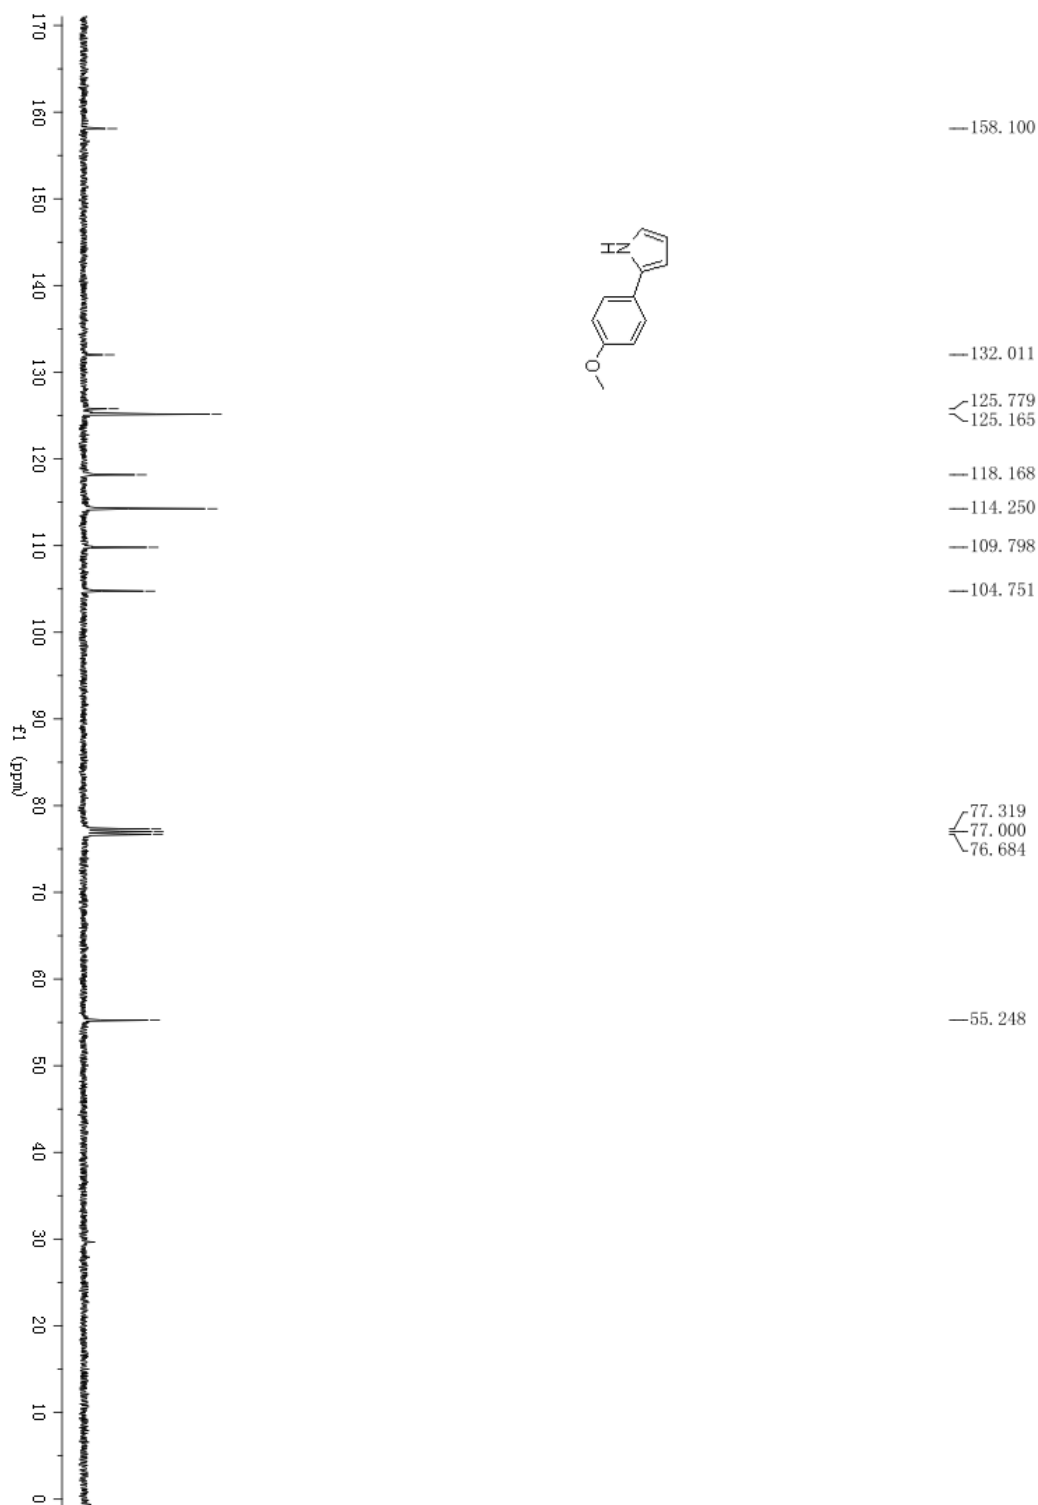

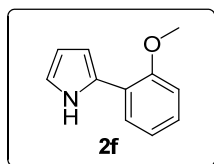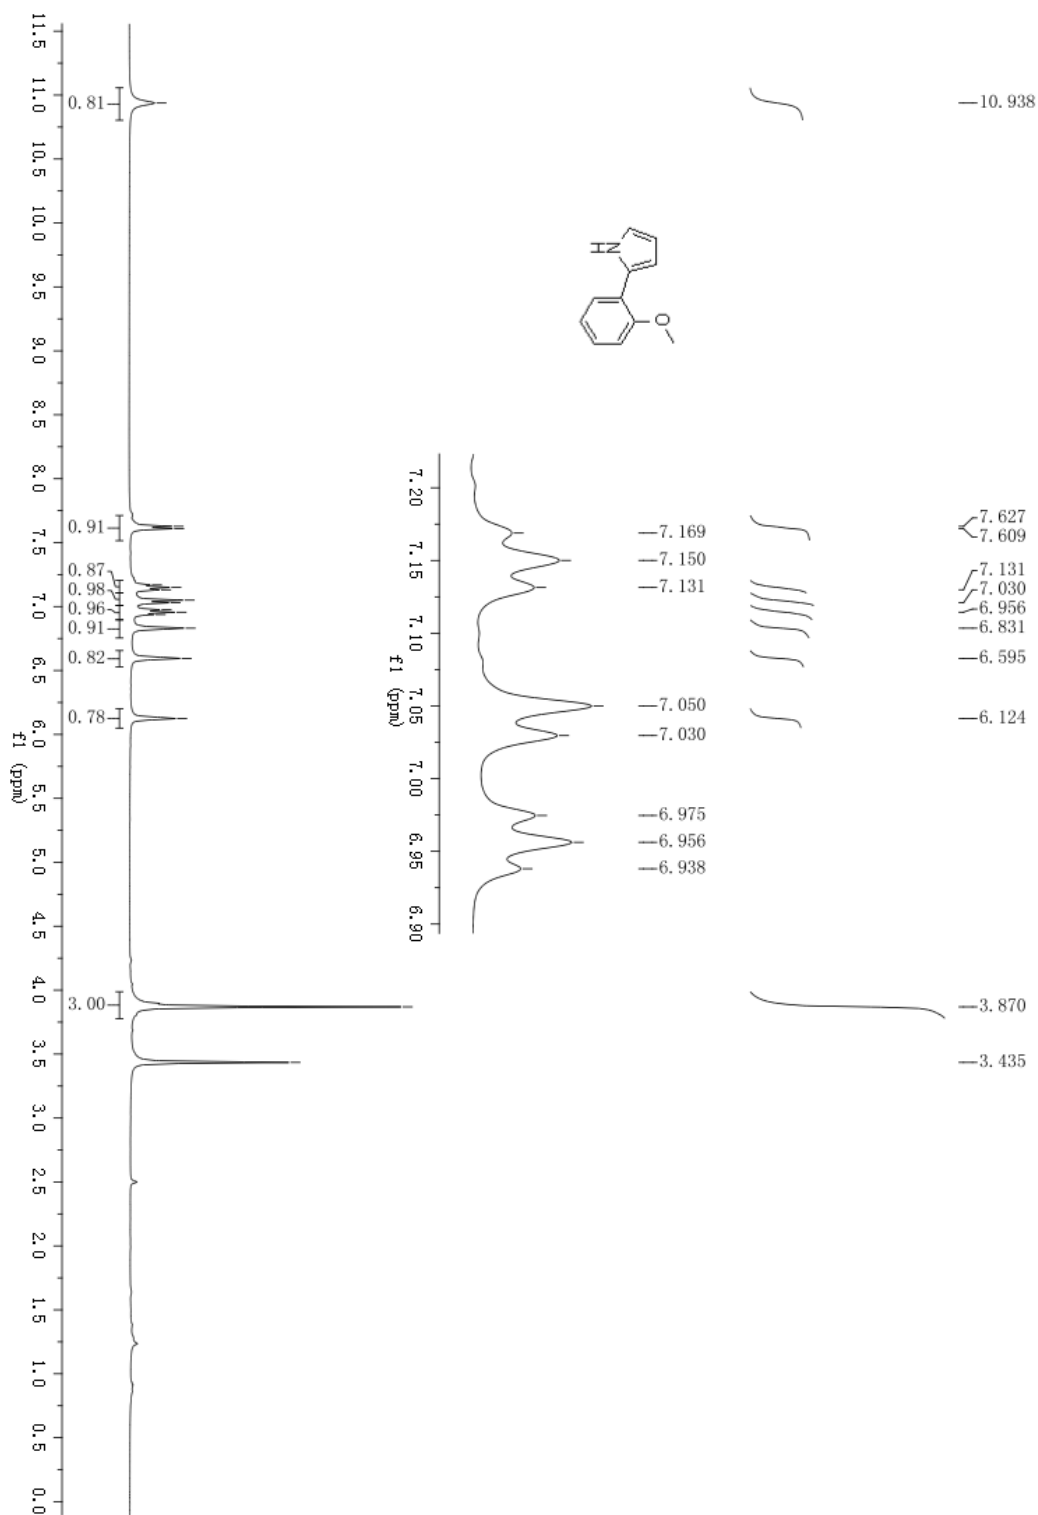

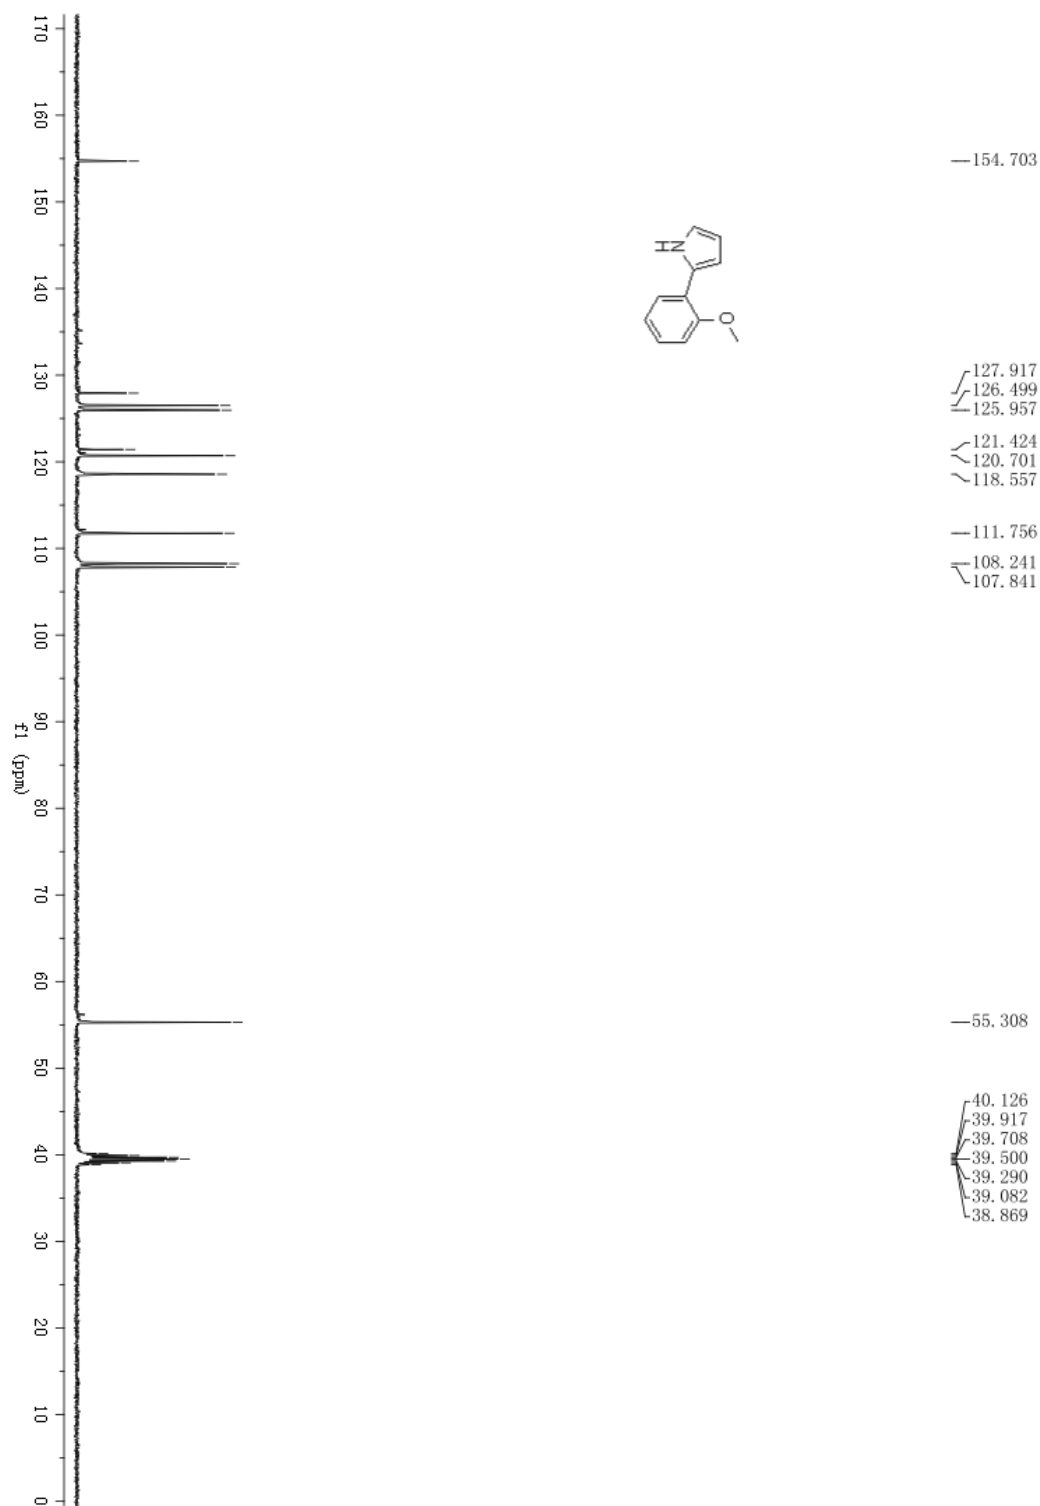

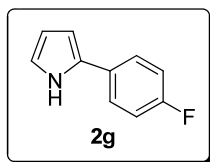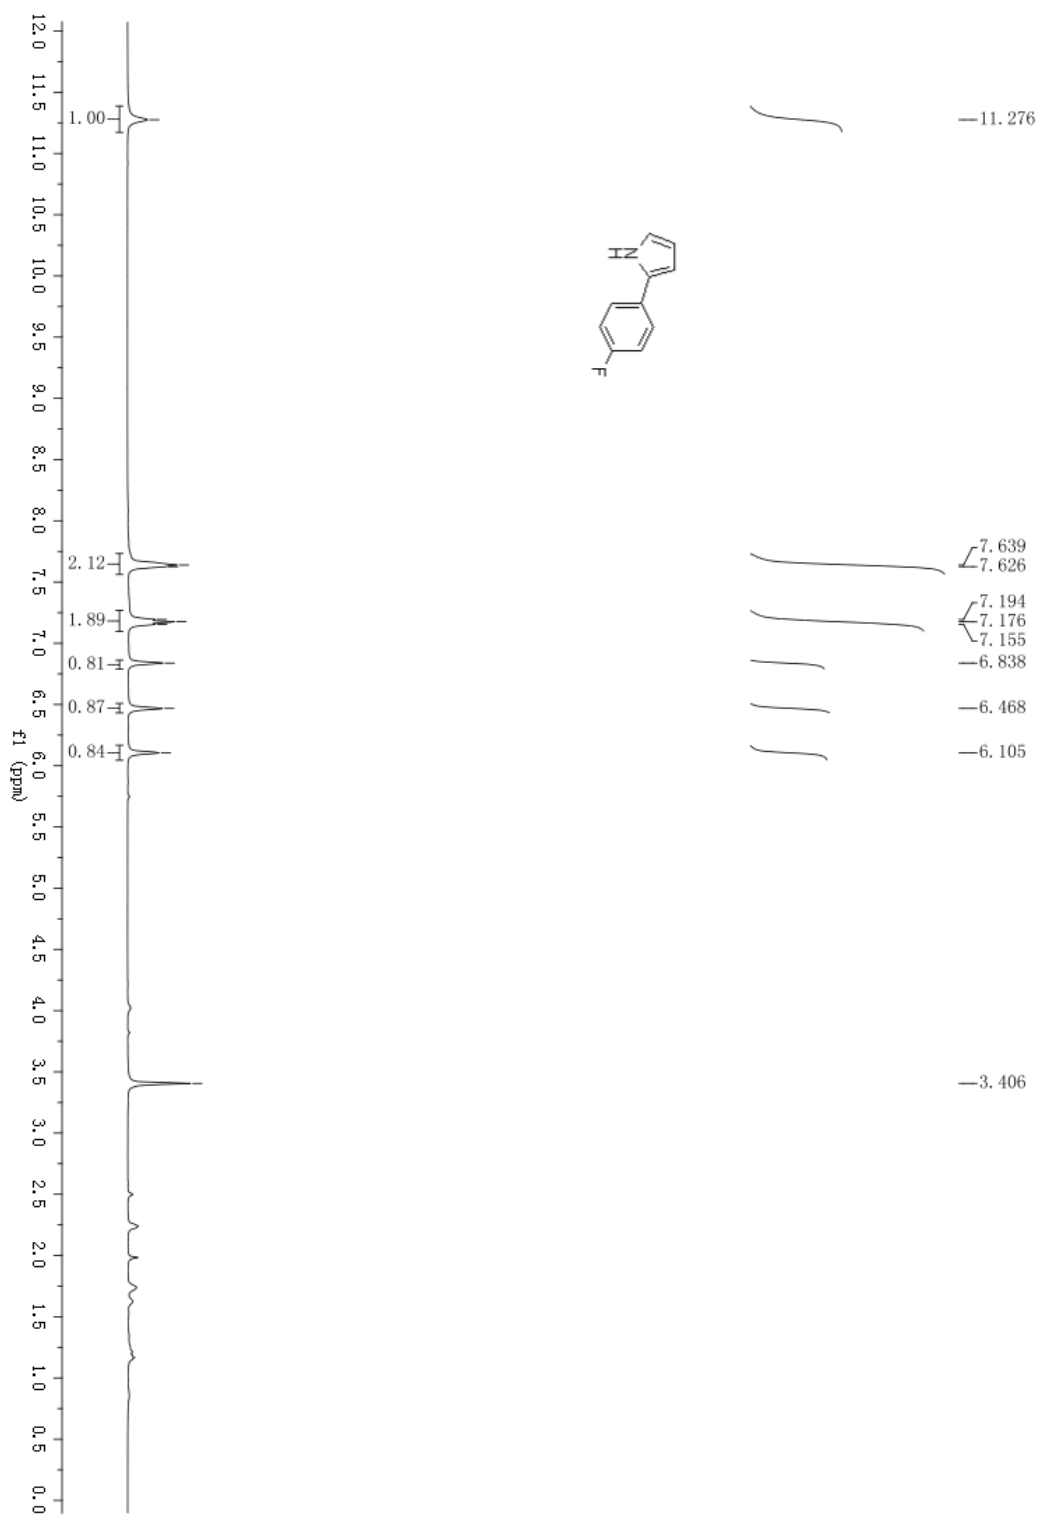

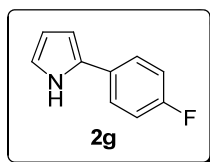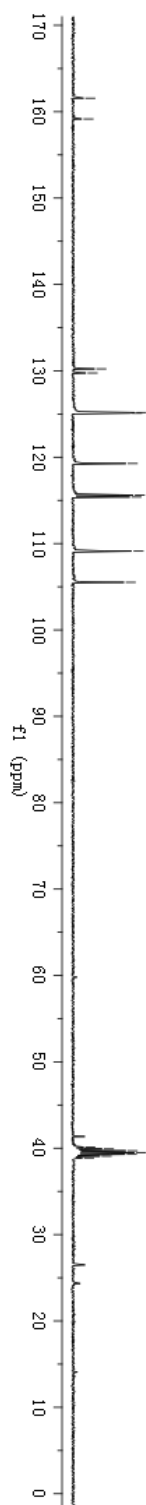

—161.563  
—159.157

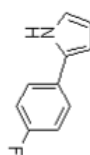

—130.229  
—129.748  
—125.174  
—125.096

—119.269  
—115.604  
—115.391

—109.122  
—105.513

—40.126  
—39.918  
—39.708  
—39.500  
—39.291  
—39.082  
—38.873

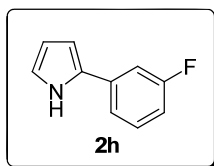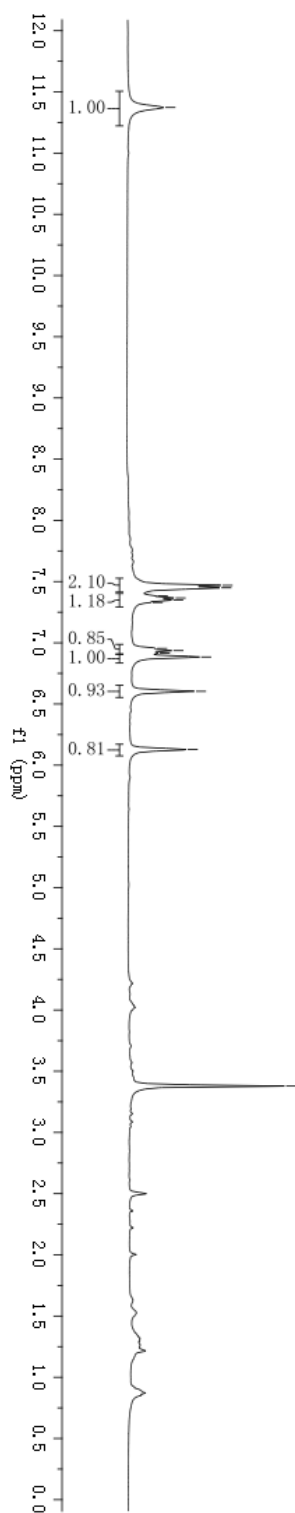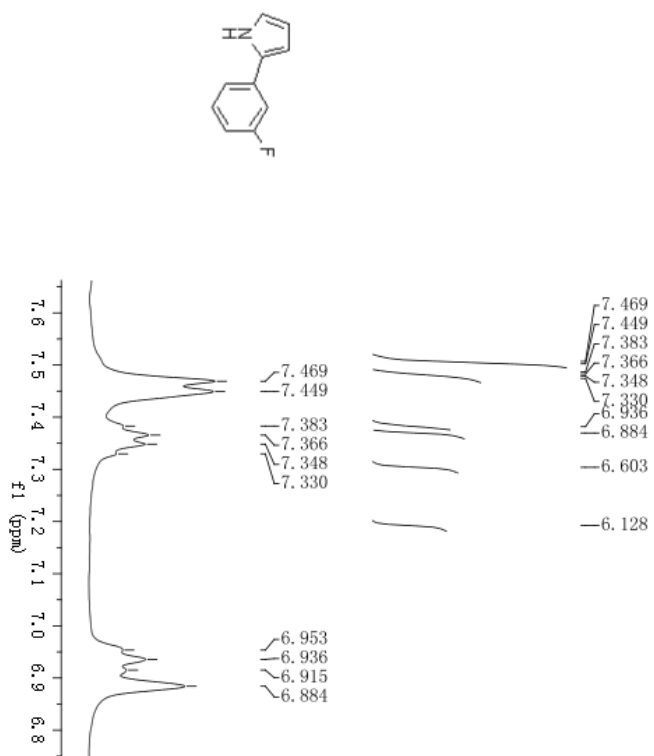



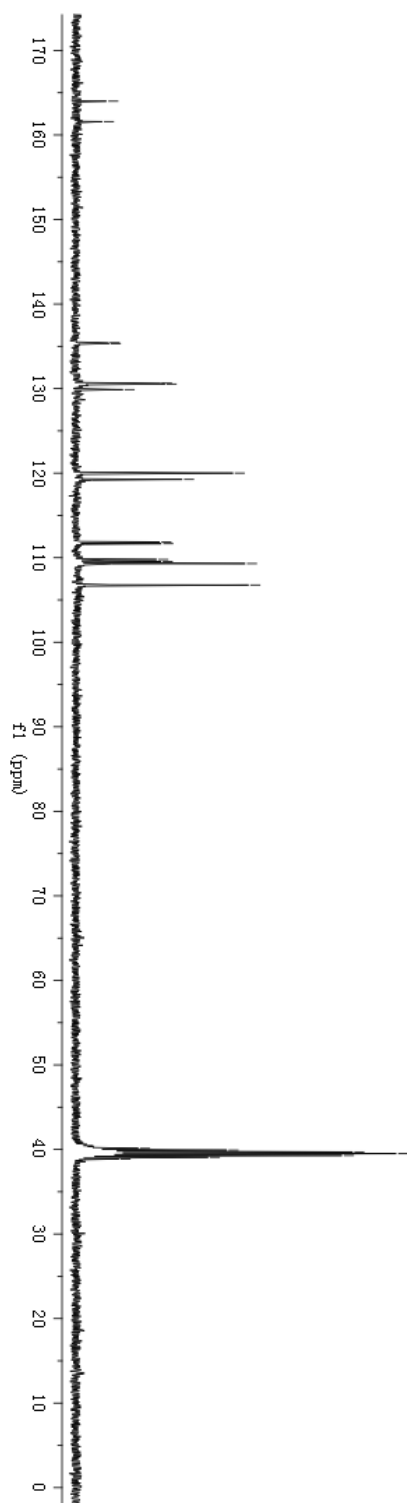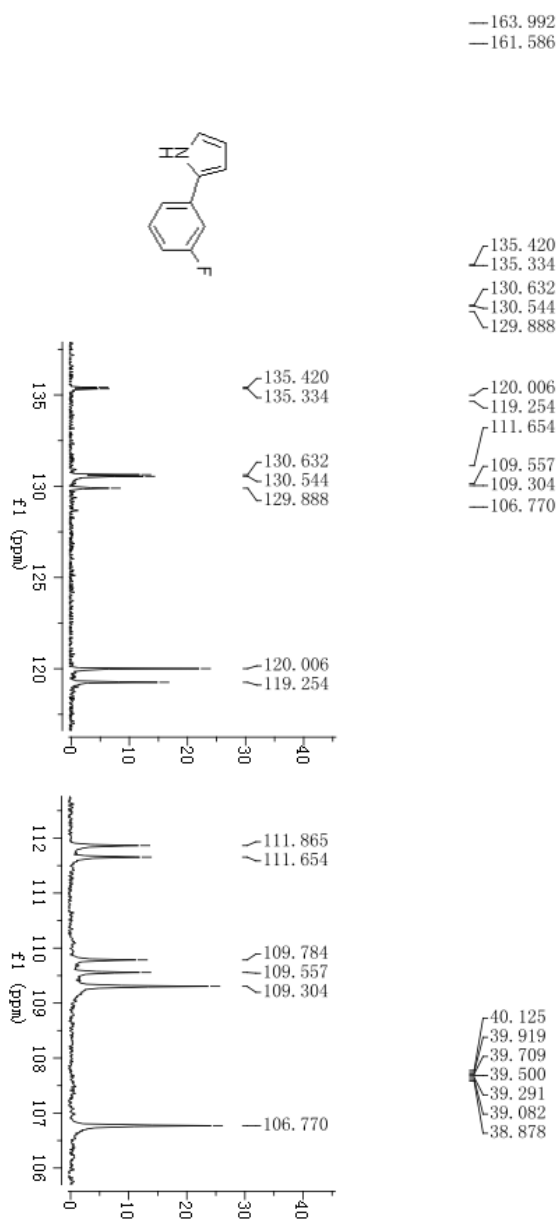

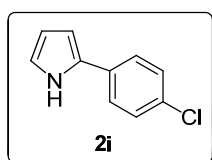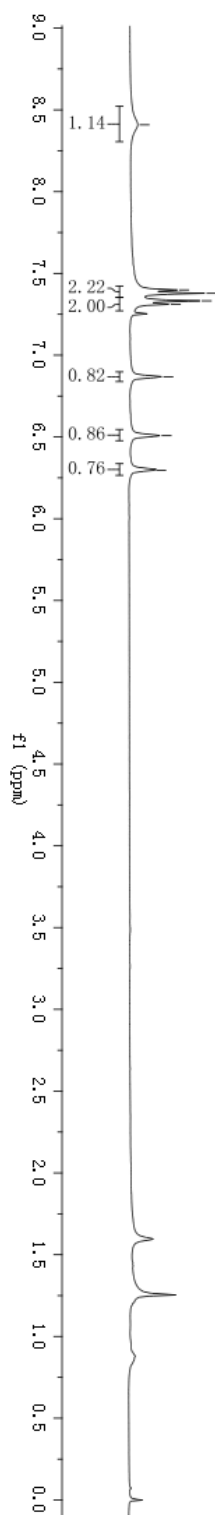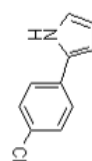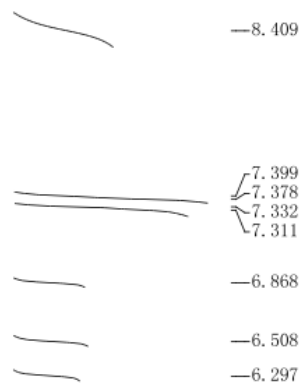

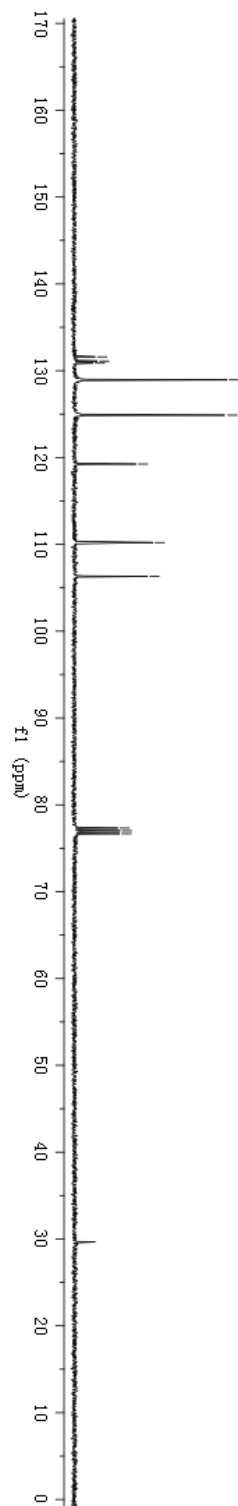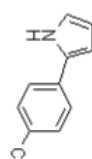

131.595  
 131.110  
 130.870  
 128.942  
 124.879  
 119.249  
 110.211  
 106.315

77.318  
 77.000  
 76.682

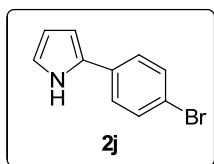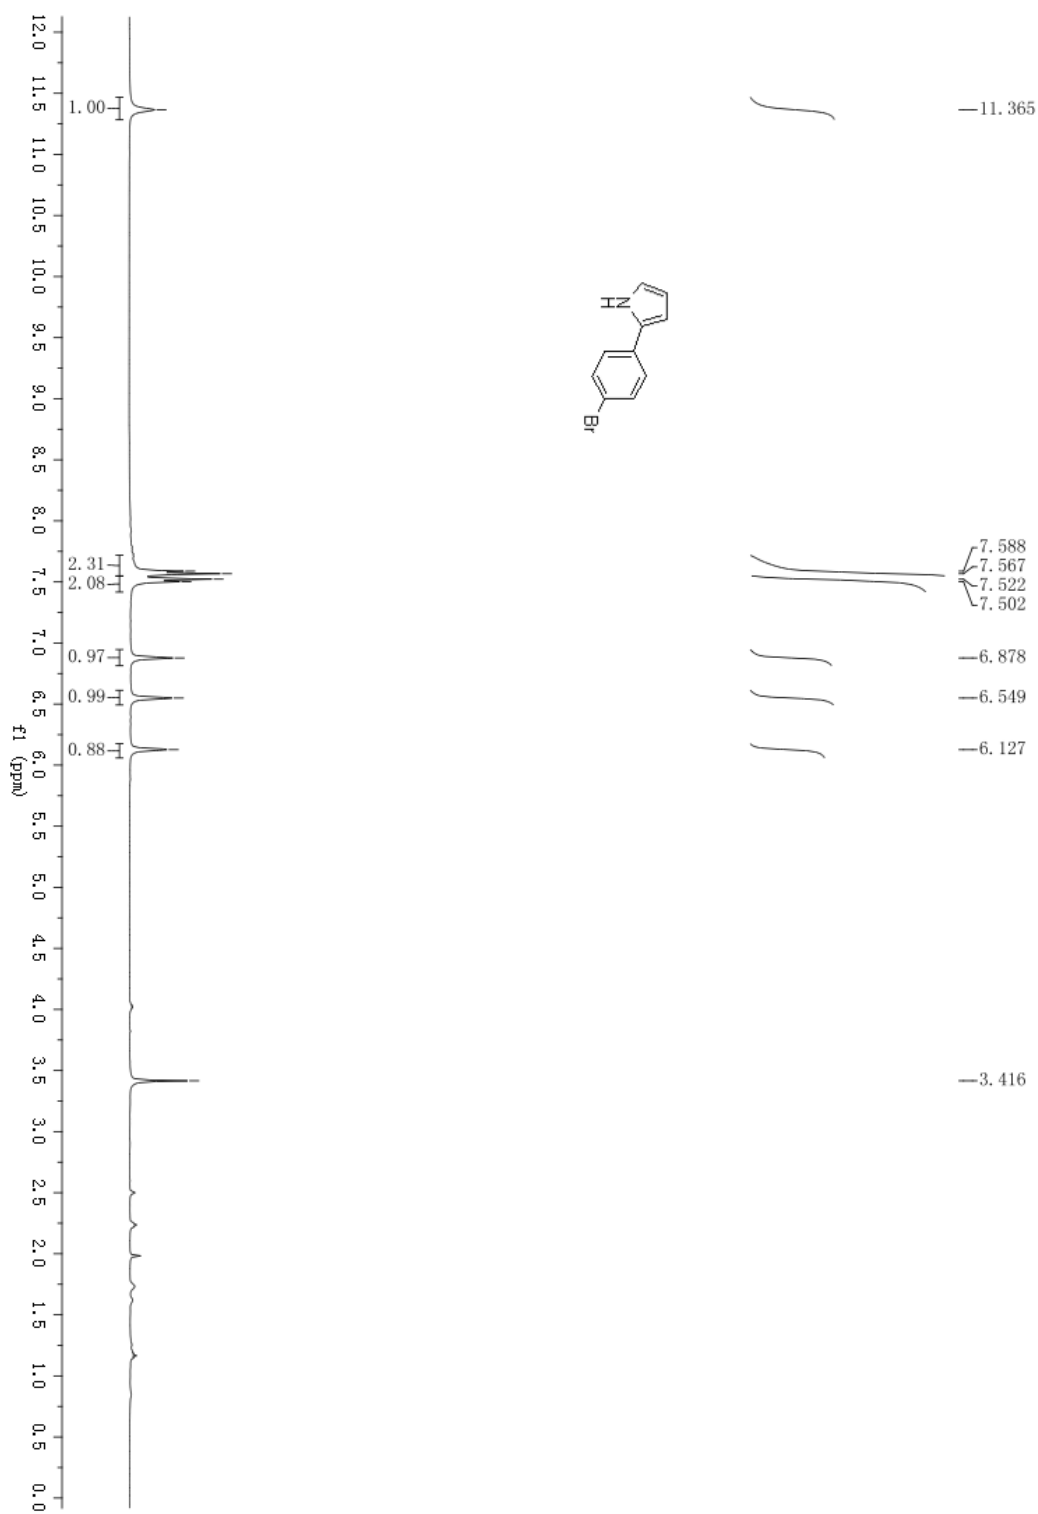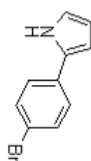

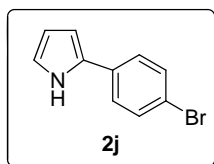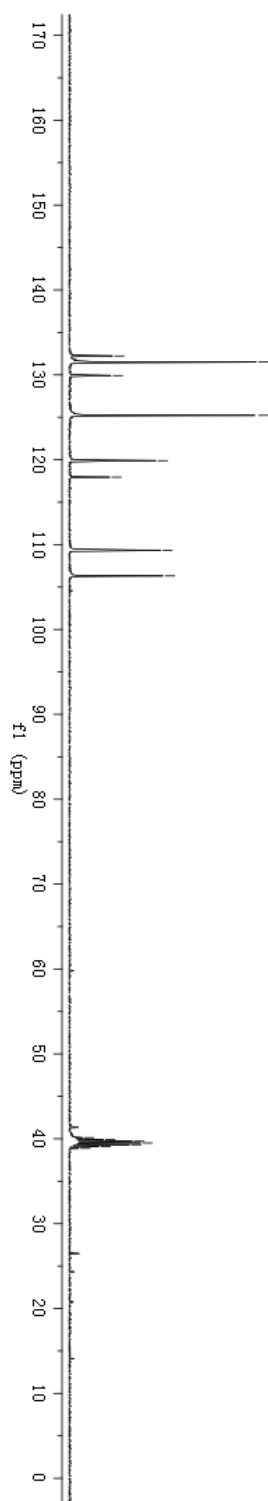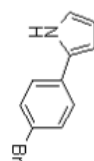

132.228  
131.511  
129.914  
125.230  
119.886  
117.946  
109.341  
106.311

40.125  
39.919  
39.709  
39.500  
39.291  
39.083  
38.874

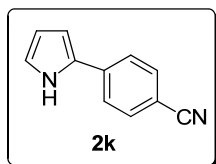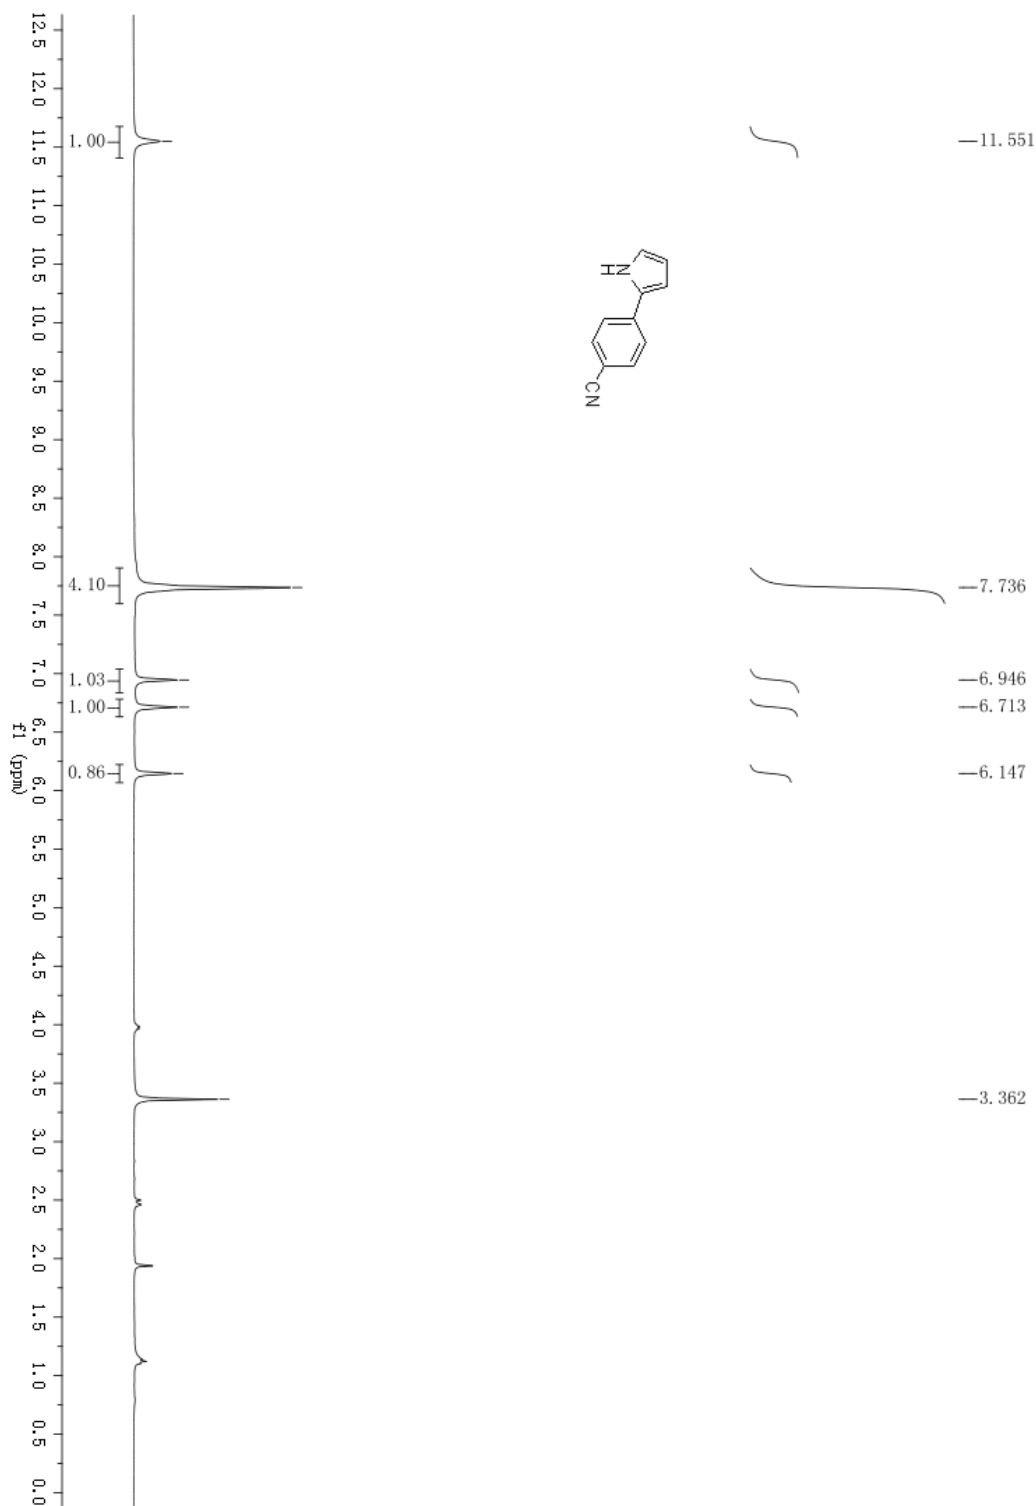

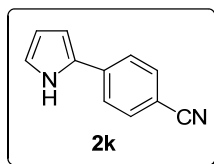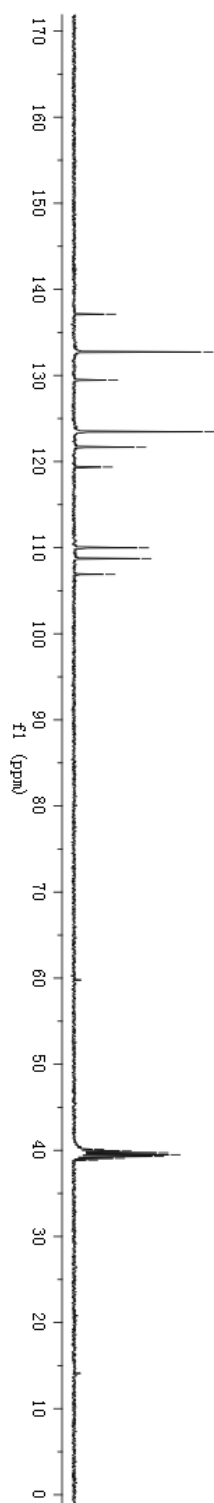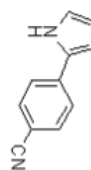

—137.119  
 —132.731  
 —129.449

✓ 123.451  
 —121.658  
 —119.358

✓ 109.979  
 ✓ 108.735  
 ✓ 106.895

40.123  
 39.917  
 39.709  
 39.500  
 39.291  
 39.081  
 38.874

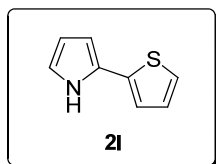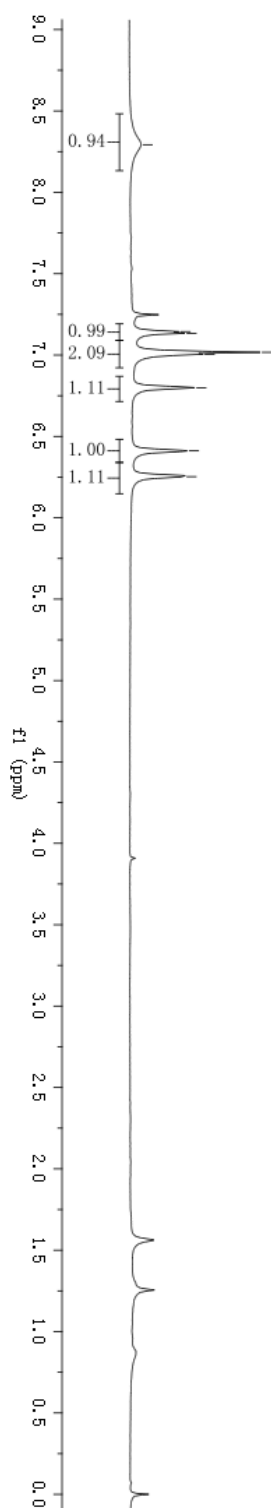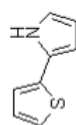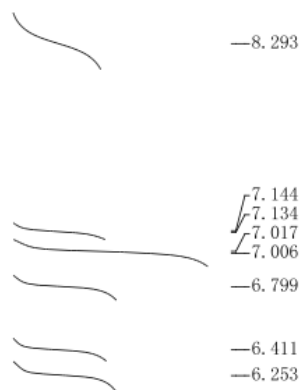



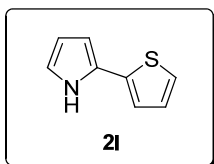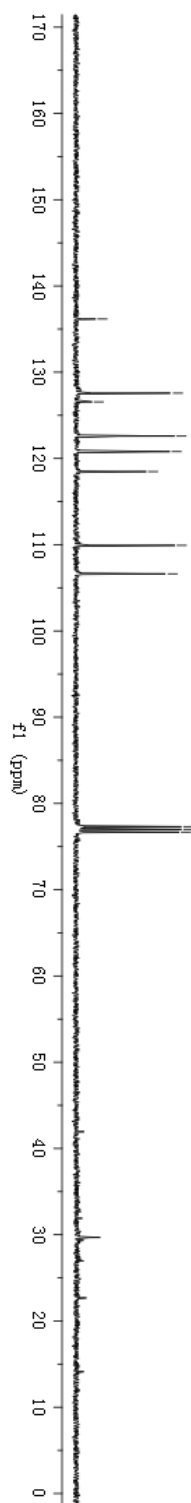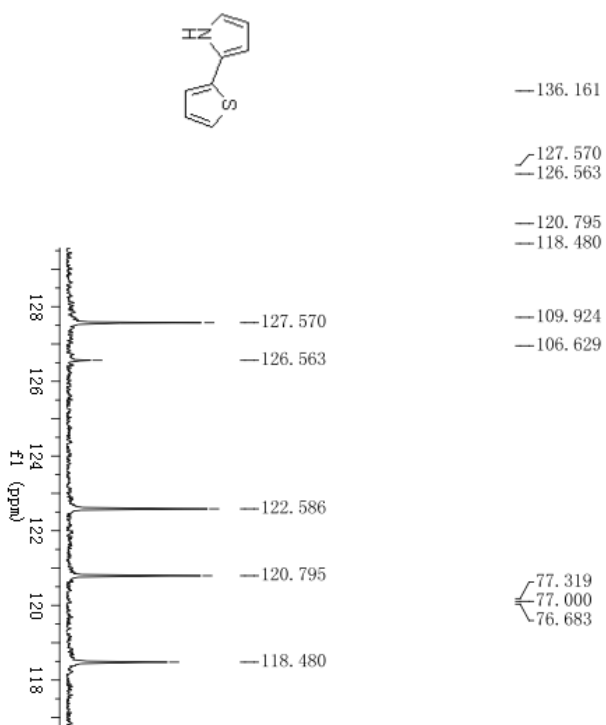

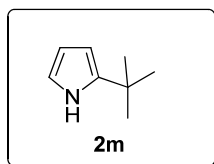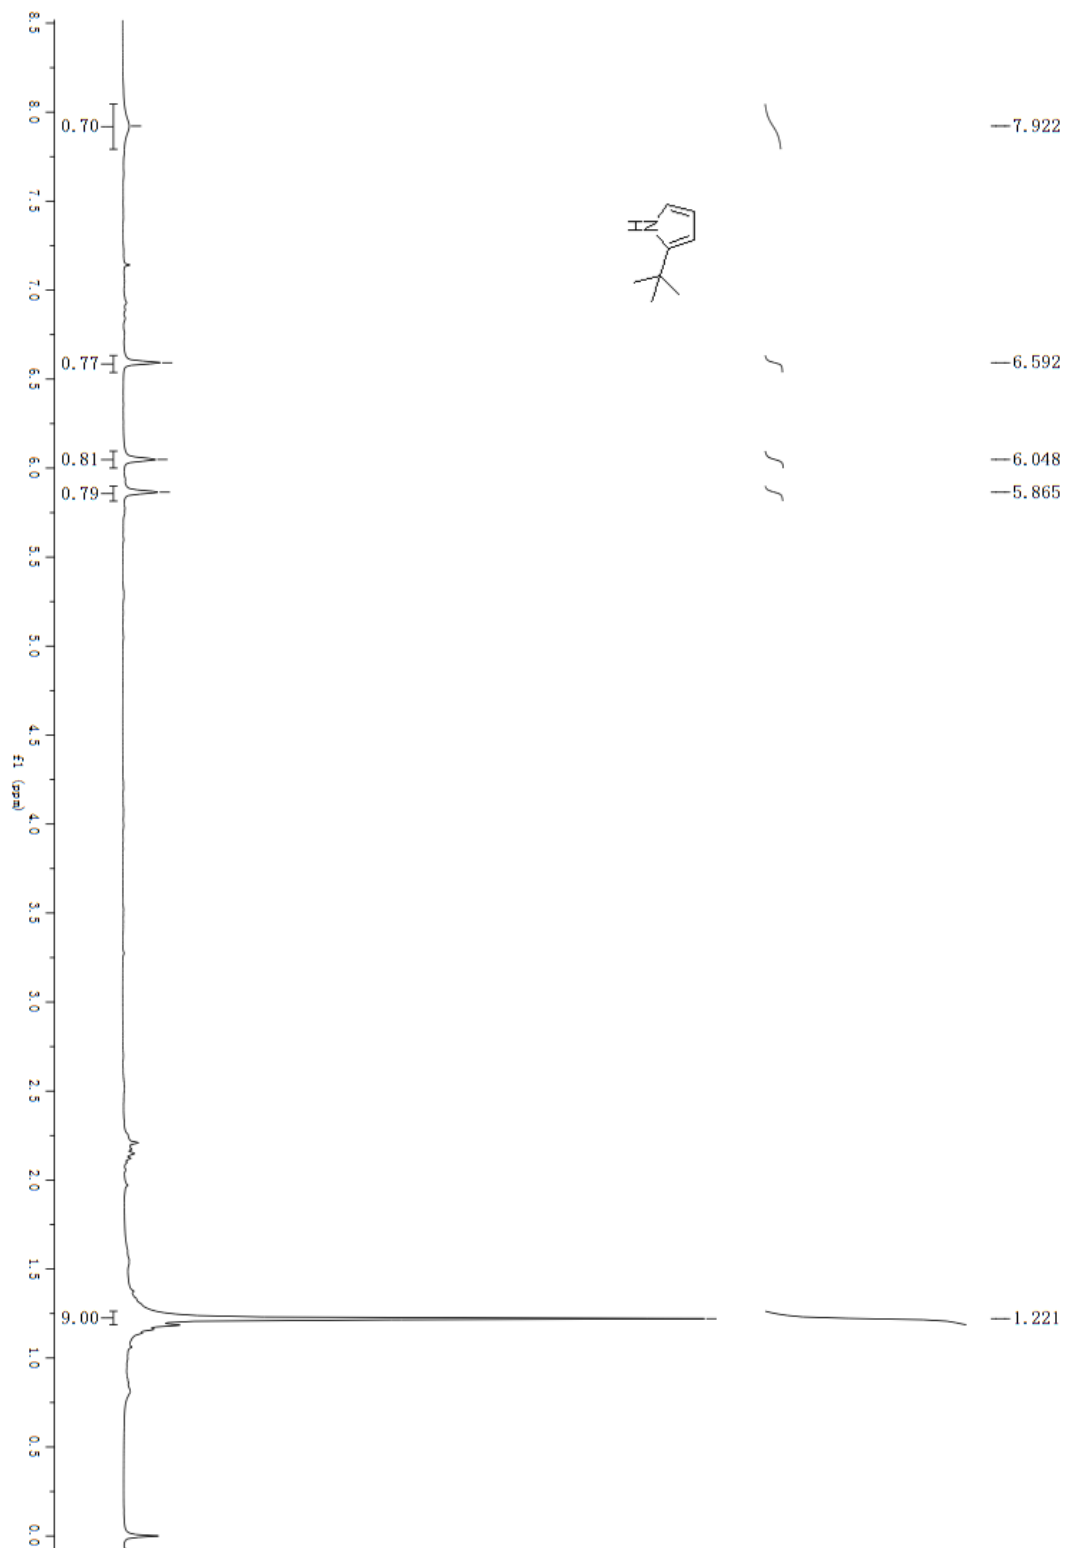

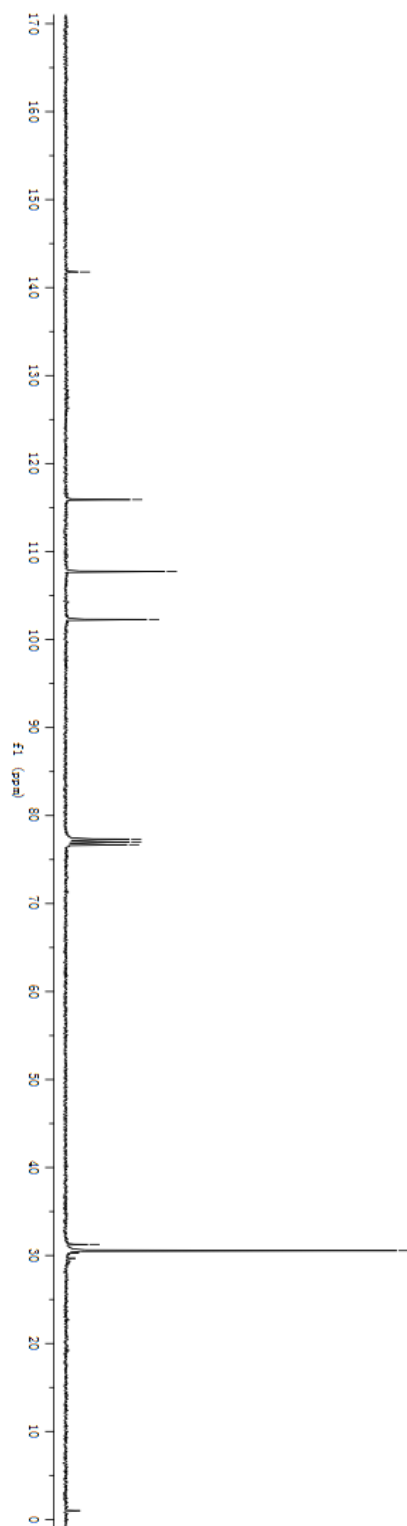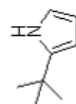

—141.779

—115.900

—107.747

—102.285

↗ 77.318  
 ↖ 77.000  
 ↘ 76.683

↗ 31.259  
 ↘ 30.555

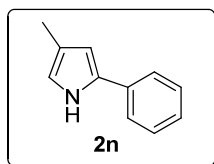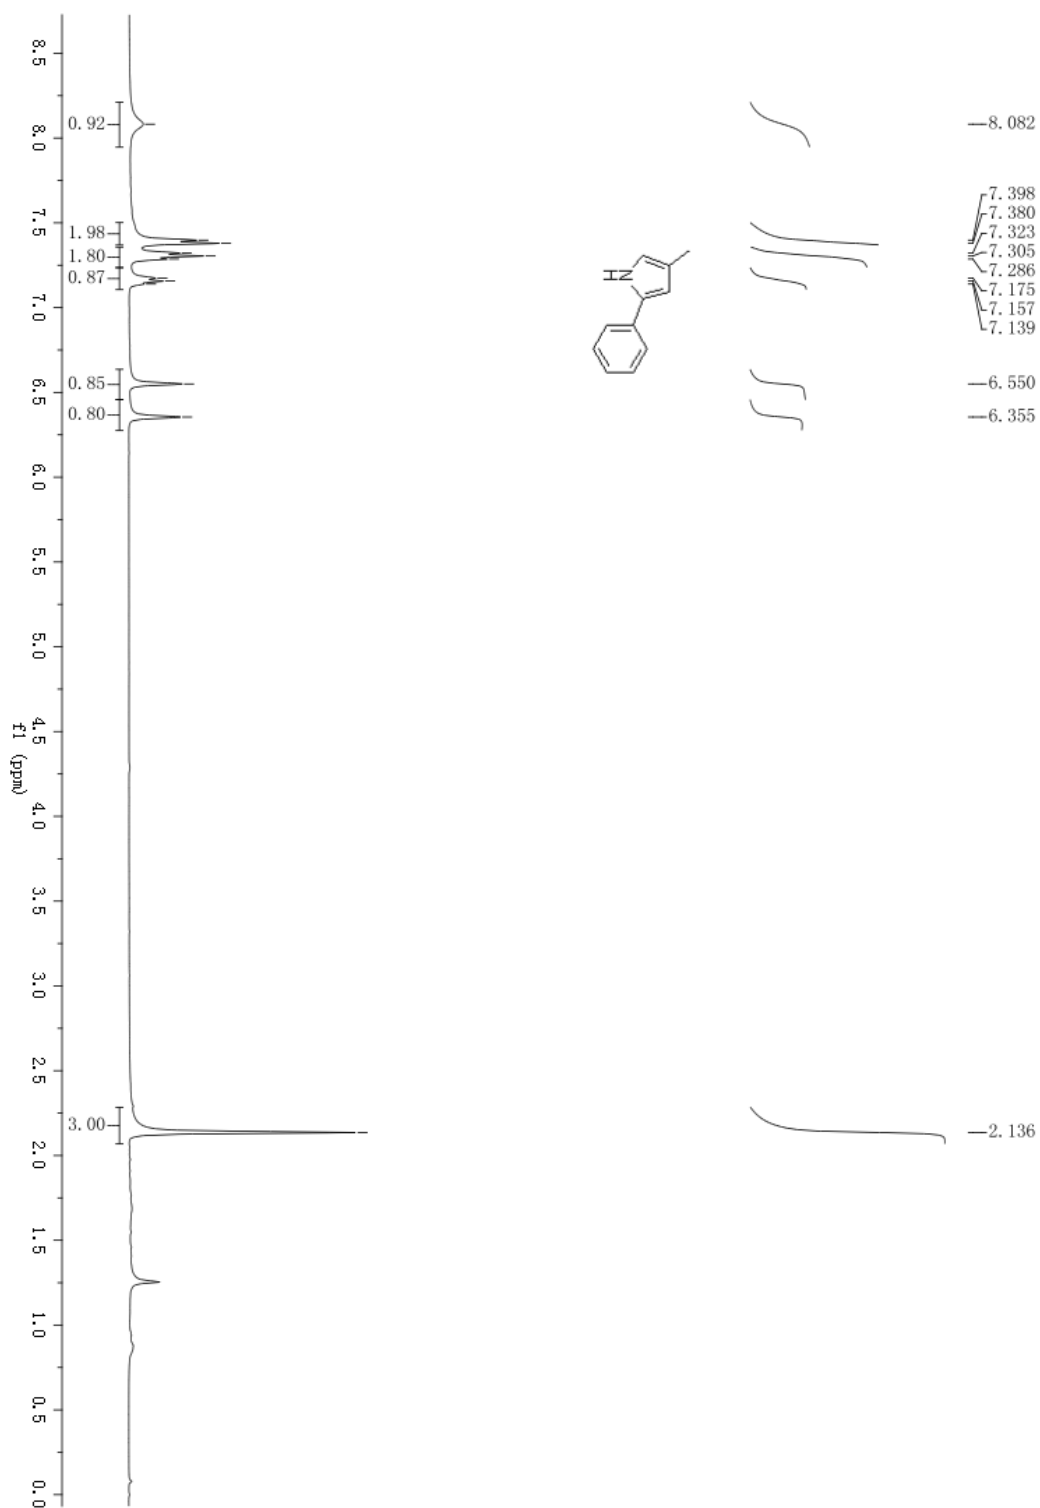

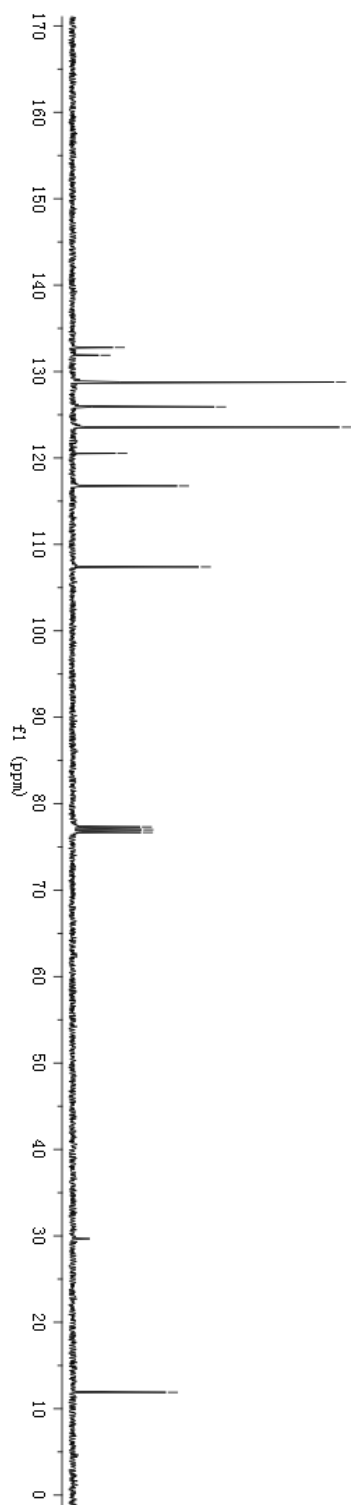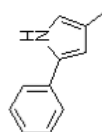

132.784  
 131.896  
 128.774  
 125.919  
 123.559  
 120.533  
 116.765  
 107.394

77.318  
 77.000  
 76.681

11.899

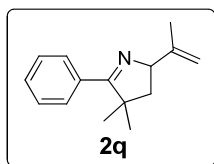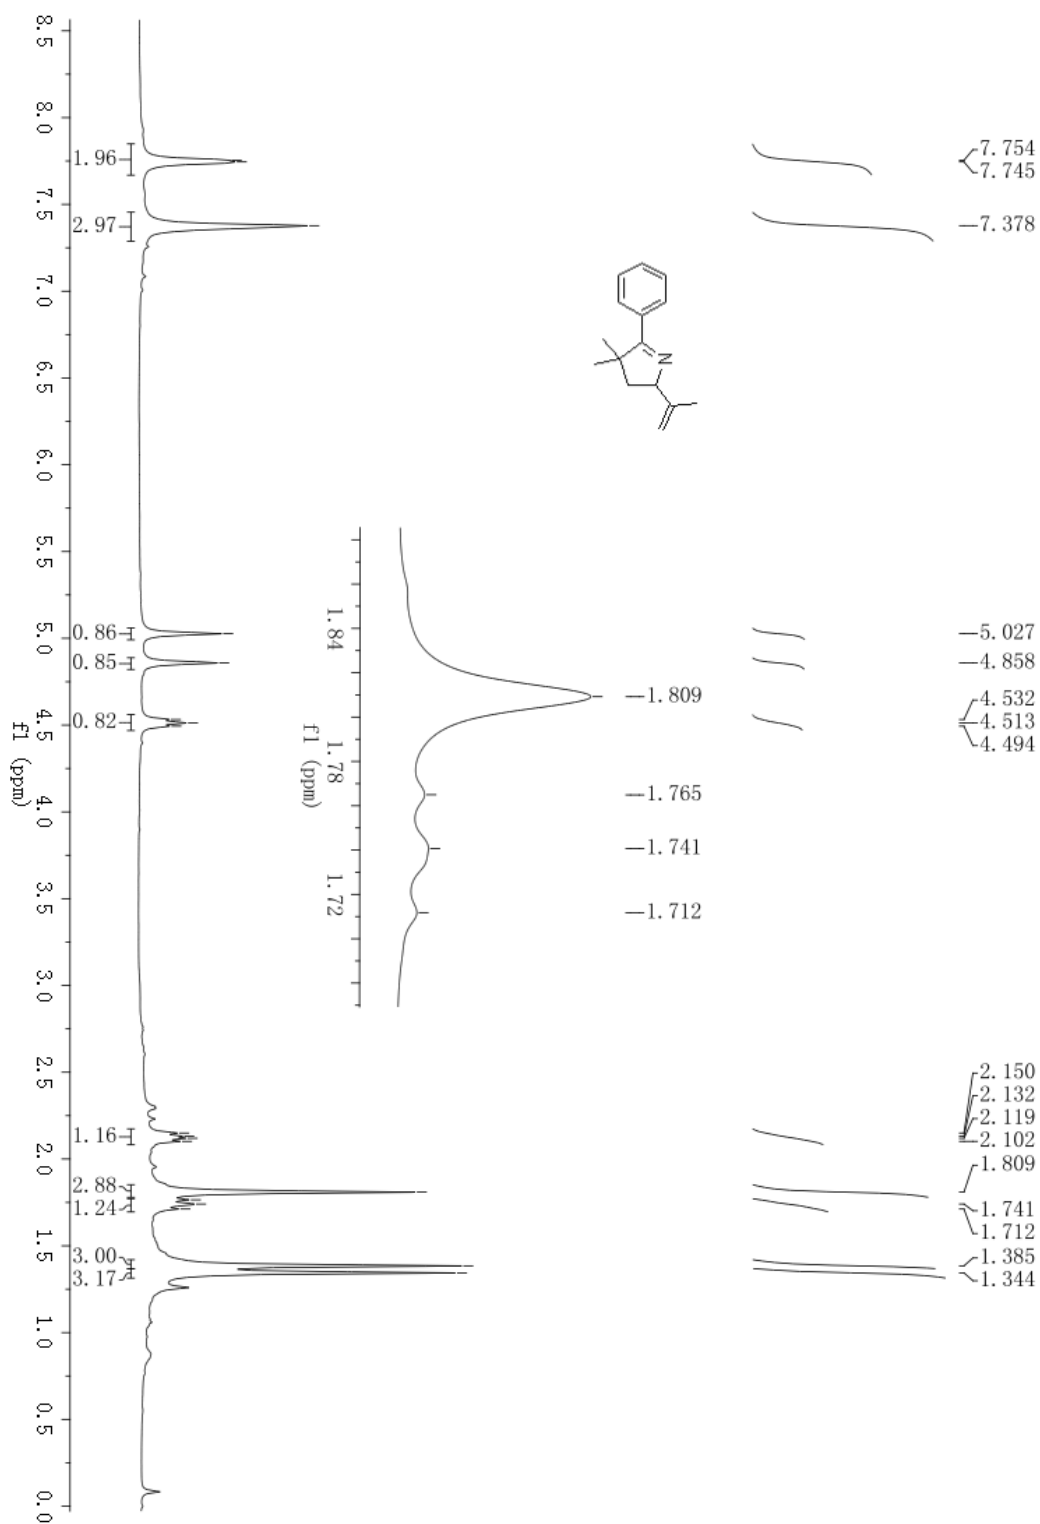

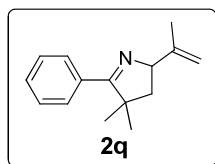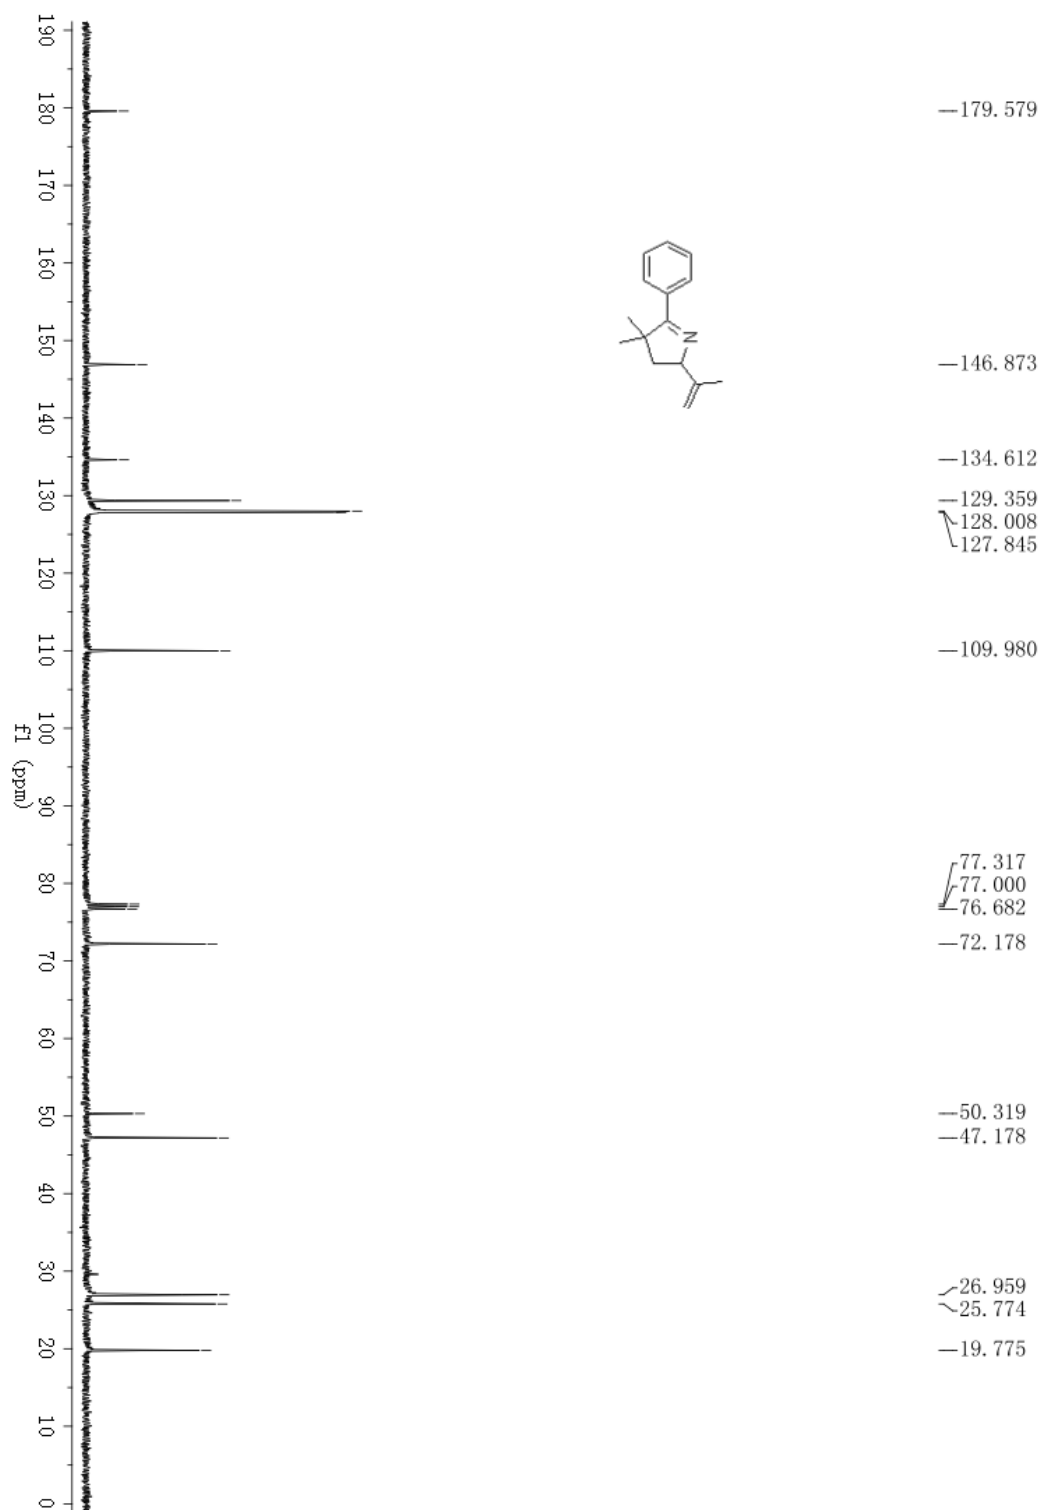

Supplement: c4cc03129f1.pdf [file c4cc03129f1.pdf]
